1 **Title:** Phase separation and nucleosome compaction are governed by the same domain of  
2 Polycomb Repressive Complex 1

3

4 **Authors:** Aaron J. Plys<sup>1,2\*</sup>, Christopher P. Davis<sup>1,2\*†</sup>, Jongmin Kim<sup>1,2</sup>, Gizem Rizki<sup>3</sup>, Madeline  
5 M. Keenen<sup>4</sup>, Sharon K. Marr<sup>1</sup> and Robert E. Kingston<sup>1,2</sup>

6

7 **Affiliations:**

8 <sup>1</sup> Department of Molecular Biology and MGH Research Institute, Massachusetts General  
9 Hospital (MGH), Boston, MA, USA.

10 <sup>2</sup> Department of Genetics, Harvard Medical School, Boston, MA, USA.

11 <sup>3</sup> Department of Stem Cell and Regenerative Biology and Harvard Stem Cell Institute, Harvard  
12 University, Cambridge, MA, USA.

13 <sup>4</sup> Department of Biochemistry and Biophysics, University of California, San Francisco, San  
14 Francisco, CA, USA.

15 \* These authors contributed equally to this work.

16 † Current address: Department of Neurobiology, Harvard Medical School, Boston, MA, USA.

17

18 **Summary**

19 Mammalian development requires effective mechanisms to repress genes whose expression  
20 would generate inappropriately specified cells. The Polycomb Repressive Complex 1 (PRC1)  
21 family complexes are central to maintaining this repression<sup>1</sup>. These include a set of canonical  
22 PRC1 complexes that each contain four core proteins, including one from the CBX family. These  
23 complexes have previously been shown to reside in membraneless organelles called Polycomb

24 bodies, leading to speculation that canonical PRC1 might be found in a separate phase from the  
25 rest of the nucleus<sup>2,3</sup>. We show here that reconstituted PRC1 readily phase separates into droplets  
26 *in vitro* at low concentrations and physiological salt conditions. This behavior is driven by the  
27 CBX2 subunit. Point mutations in an internal domain of CBX2 eliminate phase separation. These  
28 same point mutations eliminate the formation of puncta in cells, and have previously been shown  
29 to eliminate nucleosome compaction *in vitro*<sup>4</sup> and to generate axial patterning defects in mice<sup>5</sup>.  
30 Thus, a single domain in CBX2 is required for phase separation and nucleosome compaction, a  
31 finding that relates these functions to each other and to proper development.

32

### 33 **Main Text**

34 Proper organismal development requires precise regulation of gene expression that is  
35 stably maintained. Polycomb-Group (PcG) repressive complexes PRC1 and PRC2 directly act on  
36 chromatin to repress key developmental genes and maintain this repressed state throughout  
37 development. PRC2 complexes trimethylate lysine 27 on histone H3 (H3K27me3) and this  
38 modification recruits canonical PRC1 complexes (Fig. 1a)<sup>1</sup>. Canonical PRC1 complexes contain  
39 a CBX protein, which binds to the H3K27me3 mark via a chromodomain at the N-terminus and  
40 interacts with RING1b, a key PRC1 protein, via a C-Box at the C-terminus. CBX2, the focus of  
41 this study, also contains a positively charged low-complexity disordered region (LCDR).  
42 Mutations in this region that reduce the overall positive charge disrupt chromatin compaction *in*  
43 *vitro* and result in axial patterning defects in the mouse<sup>4,5</sup>.

44 Compaction of chromatin restricts the movement of nucleosomes and makes them less  
45 accessible to transcriptional activators. The resulting repressive chromatin state might be further  
46 accentuated by compartmentalizing compacted chromatin. Phase separation has been proposed

47 as a mechanism to accomplish this in heterochromatin, based upon the finding that a central  
48 component of heterochromatin, HP1 $\alpha$ , phase separates<sup>6,7</sup>. PRC1 is concentrated into nuclear  
49 foci called Polycomb bodies<sup>2,3</sup>, one of several classes of ‘membraneless organelles’ that are  
50 believed to form by phase separation to enrich and sequester components from bulk solution.  
51 Here we show that the CBX2 component of canonical PRC1 can phase separate *in vitro* and  
52 generate dynamic puncta in cells. Mutations in CBX2 that impair compaction and proper axial  
53 development in mice disrupt phase separation *in vitro* and formation of puncta in cells. This  
54 unites, into a single domain within one component of PRC1, the ability to compact nucleosomes  
55 and to phase separate, two functions that might coordinate to generate stable repression.

56 We tested various purified PRC1 protein preparations for turbidity, a known  
57 characteristic of phase separated solutions<sup>6,8</sup> (Fig. 1b). PRC1 formed a turbid solution in a  
58 concentration-dependent manner at near-physiological monovalent salt concentration (100 mM  
59 KCl). The CBX2-RING1b heterodimer (heterodimerization is necessary to stabilize full length  
60 CBX2) displayed turbidity that was more prominent than other individual PRC1 subunits,  
61 including RING1b individually. We extended these studies using purified monomeric enhanced  
62 GFP (mEGFP)<sup>9</sup> fusions of PRC1 subunits (Extended Data Fig. 1). After centrifugation of  
63 purified protein, mEGFP remained distributed throughout the solution, whereas mEGFP-CBX2  
64 + RING1b coalesced into a protein-rich pellet (Fig. 1c), indicating that mEGFP-CBX2 +  
65 RING1b could form a dense phase, separable from bulk solution. Furthermore, fluorescence  
66 microscopy revealed the formation of protein-rich foci by purified mEGFP-PRC1 and mEGFP-  
67 CBX2 + RING1b, while other PRC1 subunits remained diffusely distributed (Fig. 1d and  
68 Extended Data Fig. 2). As seen with other proteins that phase separate<sup>10</sup>, mEGFP-CBX2 +  
69 RING1b formed spherical droplets that increase in size as a function of concentration (Fig. 1e).

70 Thus, PRC1 can form phase-separated condensates *in vitro* and CBX2 is a candidate to drive this  
71 phase separation.

72 We examined CBX2 mutants to identify a region needed for phase separation. CBX2  
73 contains a positively charged LCDR (Extended Data Fig. 3a, b), a type of domain often found in  
74 proteins that phase separate<sup>11</sup>. This LCDR was previously shown to be critical for the ability of  
75 CBX2 to compact nucleosomal arrays *in vitro*<sup>4</sup> and regulate proper murine development<sup>5</sup>. A  
76 paralogous subunit, CBX7, which lacks the ability to compact nucleosomal arrays *in vitro*<sup>4</sup>, does  
77 not have a positively charged LCDR. To test the importance of the CBX2 LCDR for phase  
78 separation *in vitro*, we purified mEGFP-tagged variants of CBX2 in combination with RING1b  
79 that reduce (CBX2-23KRA) or increase (CBX2-DEA) the net positive charge of the region, as  
80 well as a heterodimer of mEGFP-CBX7 and RING1b (Fig. 2a and Extended Data Fig. 3c). In  
81 contrast to wild-type CBX2, both mEGFP-CBX2-23KRA + RING1b and mEGFP-CBX7 +  
82 RING1b failed to form a protein-rich pellet after centrifugation, while mEGFP-CBX2-DEA +  
83 RING1b retained the ability to separate from bulk solution (Fig. 2b). In agreement with these  
84 data, fluorescence microscopy revealed condensates formed by mEGFP-CBX2 + RING1b and  
85 mEGFP-CBX2-DEA + RING1b, whereas mEGFP-CBX2-23KRA + RING1b and mEGFP-  
86 CBX7 + RING1b remained diffuse (Fig. 2c and Extended Data Fig. 2). In addition, PRC1  
87 containing mEGFP-CBX2-23KRA showed impaired phase separation relative to PRC1  
88 containing wild-type CBX2, indicating that the LCDR of CBX2 is a driving force for PRC1  
89 phase separation (Fig. 2b, c). Finally, a CBX2 mutation, disrupting only 13 rather than 23  
90 positively charged residues, CBX2-13KRA, also known to impair nucleosome compaction *in*  
91 *vitro* and axial development in mice, failed to phase separate *in vitro* (Extended Data Fig. 4a).  
92 We conclude the positive charge within the CBX2 LCDR is critical for phase separation *in vitro*,

93 in addition to its previously described roles in chromatin compaction<sup>4</sup> and proper axial patterning  
94 in mice<sup>5</sup>.

95 The observation that mutations in positively charged residues disrupt phase separation  
96 raised the hypothesis that negatively charged residues in CBX2 might form multivalent  
97 interactions with the positive residues. Mutation of negative residues within the LCDR (CBX2-  
98 DEA) did not impact phase separation, leading us to consider other sources of negative charge.  
99 Phosphorylation increases negative charge and modulates phase separation of proteins both  
100 positively and negatively<sup>6,7,12-15</sup>. Serine residues in CBX2 are phosphorylated *in vivo* and  
101 targeted by casein kinase II (CK2) *in vitro*<sup>16</sup>. We tested a role for phosphorylation in condensate  
102 formation by using *E.coli* to express a truncated, non-phosphorylated, form of CBX2 (mEGFP-  
103 CBX2ΔCbox) stable in the absence of RING1b. We also co-expressed this protein with the  
104 catalytic subunits of CK2 to generate phosphorylated mEGFP-CBX2ΔCbox. Phosphorylation  
105 was validated by mass spectrometry (Extended Data Fig. 5, Supplementary Table 1).  
106 Phosphorylated mEGFP-CBX2ΔCbox formed spherical droplets, distinct in size and shape from  
107 the more diffuse signal and small non-spherical aggregates formed by unphosphorylated  
108 mEGFP-CBX2ΔCbox (Fig. 2d). Thus, phosphorylation of CBX2 increases the ability of CBX2  
109 to phase separate, suggesting a role for electrostatic interactions within CBX2 in driving  
110 condensate formation.

111 To determine whether the droplets formed by mEGFP-CBX2ΔCbox were solid  
112 aggregates or reversible liquid condensates, we performed a salt-dependent reversibility assay.  
113 Droplets were formed and visualized as described above (Fig. 2d, e) and the salt concentration  
114 was then increased to 500 mM KCl. At higher salt, the preformed droplets drastically reduced in  
115 number and size (Fig. 2e). Reducing the salt concentration to 100 mM KCl resulted in

116 reformation of droplets, albeit smaller due to reduced protein concentration (Fig. 2e). These  
117 results support the hypothesis that reversible electrostatic interactions between phosphorylated  
118 serines and positively charged residues are necessary for phase separation of CBX2 *in vitro*.

119 As mutations in the CBX2 LCDR impair its ability to phase separate *in vitro*, we assessed  
120 the impact of these mutations on the morphology of structures formed by PRC1 *in vivo*. We  
121 expressed different mEGFP-CBX2 variants under a doxycycline-inducible promoter in 3T3  
122 fibroblasts. Induction of mEGFP expression produced diffuse signal throughout the nucleus and  
123 cytoplasm (Fig. 3a, b). In contrast, mEGFP-CBX2 formed nuclear puncta, similar to those  
124 previously observed for PRC1 in other cell types<sup>2,3,17,18</sup>. mEGFP-CBX2-KRA mutants failed to  
125 form nuclear puncta, while the mEGFP-CBX2-DEA mutant formed puncta similar to those seen  
126 for wild-type CBX2 (Fig 3a, b and Extended Data Fig. 4b, c). Quantification of puncta in  
127 mEGFP-CBX2 and mEGFP-CBX2-23KRA expressing nuclei revealed a clear difference in total  
128 number and distribution across a range of doxycycline concentrations (Fig. 3c, Extended Data  
129 Fig. 6). There was also a significantly higher number of puncta in mEGFP-CBX2-13KRA  
130 compared to mEGFP-CBX2-23KRA expressing nuclei. This intermediate defect for CBX2-  
131 13KRA mirrors the less severe defects in chromatin compaction activity *in vitro* and *in vivo* axial  
132 patterning phenotype for this mutant relative to CBX2-23KRA. To address whether these puncta  
133 contain canonical PRC1 subunits, we used co-immunoprecipitation. This showed that both  
134 mEGFP-CBX2 and mEGFP-CBX2-23KRA interacted with other PRC1 subunits *in vivo*  
135 (Extended Data Fig. 7a, Supplementary Table 2). Co-immunofluorescence of RING1b revealed  
136 extensive co-localization with mEGFP-CBX2 (Extended Data Fig. 7b) in 3T3 fibroblasts, which  
137 do not endogenously express CBX2 (Extended Data Fig. 7c). Thus, the puncta visualized by  
138 mEGFP-CBX2 contained PRC1. These *in vivo* results recapitulate the findings of our *in vitro*

139 assays and underscore the importance of positively charged residues in the CBX2 LCDR for  
140 PRC1 phase separation.

141 Phase-separated condensates undergoing demixing with the surrounding aqueous  
142 environment display a rapid exchange of interacting components<sup>19</sup>. To interrogate the dynamics  
143 of nuclear puncta formed by CBX2 *in vivo*, we performed live cell microscopy of 3T3 fibroblasts  
144 expressing mEGFP-CBX2 and mEGFP-CBX2-23KRA (Figure 3d and Extended Data Fig. 8). As  
145 seen in formaldehyde-fixed cells, mEGFP-CBX2 organized into puncta whereas mEGFP-CBX2-  
146 23KRA remained diffusely distributed throughout the nucleus. To examine whether mEGFP-  
147 CBX2 puncta behave as liquid-like condensates, we performed fluorescence recovery after  
148 photobleaching (FRAP). Upon photobleaching, mEGFP-CBX2 puncta rapidly recover  
149 fluorescence within 60 seconds (Fig. 3e, f). Consistent with these nuclear puncta behaving as  
150 phase separated condensates, we observed a rapid loss of puncta upon addition of 1,6-  
151 hexanediol, as observed for other phase separated bodies (Extended Data Fig. 9)<sup>7,12,20-22</sup>. We  
152 conclude that CBX2 within puncta can readily exchange with free CBX2 in the surrounding  
153 environment, consistent with the properties of a liquid-like condensate.

154 Phase separation can facilitate inclusion or exclusion of macromolecules from the  
155 protein-dense phase, creating a mechanism to compartmentalize biochemical activities<sup>11</sup>. We  
156 tested whether ligands of PRC1, including DNA, RNA, and nucleosomal arrays, could  
157 incorporate into PRC1 condensates *in vitro*. We generated polynucleosomal templates using  
158 Cy5-labeled G5E4 DNA<sup>23</sup>, either with heterogeneously modified polynucleosomes or with  
159 polynucleosomes containing an H3K27me3 analog<sup>24</sup>. We also included Cy5-labeled G5E4 DNA  
160 alone, as well as Cy5-labeled CAT7 RNA previously shown to associate with PRC1<sup>25</sup>. We  
161 monitored incorporation of these ligands into PRC1 condensates using fluorescence microscopy.

162 All four ligands were incorporated into condensates formed by mEGFP-CBX2 + RING1b (Fig.  
163 4a) and mEGFP-PRC1 (Fig. 4b), whereas free Cy5 dye was not found within the condensate  
164 phase. Ligands incorporated into PRC1 condensates regardless of whether they were added to  
165 preformed droplets (Extended Data Fig. 10) or included during droplet formation (Fig. 4a). Thus,  
166 PRC1 condensates partition with physiologically relevant ligands, suggesting a mechanism to  
167 compartmentalize these interactions *in vivo*.

168 The bacterially produced unphosphorylated mEGFP-CBX2 $\Delta$ Cbox did not phase separate  
169 by itself (Fig. 2d) but can compact nucleosomal templates<sup>4</sup>, indicating a possible difference  
170 between these activities. We tested the ability of this protein to phase separate under conditions  
171 where compaction can occur, which requires the presence of nucleosomal arrays. Nucleosomal  
172 arrays might increase the effective local concentration of this protein, and thus might enhance  
173 interactions required for phase separation. Incubating unphosphorylated mEGFP-CBX2 $\Delta$ Cbox  
174 with nucleosomal arrays resulted in condensate formation (Fig. 4c, d). Furthermore, we observed  
175 that nucleosome arrays containing an H3K27me3 analog, which bind with higher affinity to the  
176 CBX2 protein<sup>26</sup>, were more proficient at inducing condensate formation at lower protein  
177 concentration. This result is consistent with the hypothesis that phase separation requires a high  
178 local concentration of CBX2 protein that can be driven by phosphorylation to increase  
179 electrostatic interactions, or to a lesser extent by the addition of nucleosomal arrays to provide a  
180 scaffold to facilitate CBX2 interactions.

181 We show that the abilities of PRC1 to phase separate and to compact nucleosomes both  
182 require the LCDR of CBX2 and are inhibited by mutation of basic residues. As this domain lies  
183 downstream of the chromodomain that binds H3K27me3, several Polycomb-Group functions are  
184 combined into a single protein. A simple hypothesis is that nucleosome compaction and phase



185 separation are manifestations of the same phenomenon, and that compacted and phase separated  
186 H3K27me3 nucleosomes are separated from the rest of the nucleus. It has previously been shown  
187 that the Polyhomeotic (PH) subunit of PRC1 mediates subnuclear clustering through  
188 polymerization of its SAM domain<sup>27-29</sup>. We cannot rule out the possibility that PHC1/2  
189 contribute to PRC1 phase separation as only mutants defective in polymerization were tested  
190 here for technical reasons. Notably, PHC1 contains an LCDR rich in glutamine residues, which  
191 are highly represented in the LCDRs of other proteins that phase separate<sup>30</sup>. Altogether, we  
192 propose a model whereby PRC1 compacts nucleosomes and organizes them into phase separated  
193 subnuclear condensates in a concerted manner to efficiently and stably repress transcription (Fig.  
194 4e). This raises questions concerning the state of phase separation by PRC1 during replication  
195 and cell division and whether phase separation plays a role in the stable inheritance of repression  
196 during differentiation.

197

## 198 **Methods**

### 199 Cell Culture

200 NIH-3T3 fibroblasts (ATCC) were cultured in DMEM supplemented with fetal calf serum to  
201 10% concentration (v/v) and 25 mM HEPES pH 7.5. HEK293T (ATCC) cells were cultured in  
202 IMDM supplemented with fetal bovine serum to 10% concentration (v/v). CJ7 (a gift of Stuart  
203 Orkin<sup>31</sup>) mouse embryonic stem cells (mESCs) were cultured on a layer of mitotically-  
204 inactivated PMEF-N mouse embryonic fibroblasts (Millipore) in DMEM supplemented with  
205 fetal bovine serum (Hyclone) to 15% concentration (v/v), 1X L-glutamine, 1X  
206 penicillin/streptomycin, and 10 ng/mL leukemia inhibitory factor (LIF). CJ7 media was  
207 exchanged daily. NIH-3T3, HEK293T, and CJ7 cells were maintained in a humidified incubator

208 at 37°C with 5% CO<sub>2</sub>. Sf9 cells were maintained in either Hyclone CCM3 or ESF 921  
209 (Expression Systems) media at 27°C in a shaking incubator.

210

### 211 Isolation of primary tissue from mice

212 All animal procedures were performed according to NIH guidelines and approved by the  
213 Committee on Animal Care at Massachusetts General Hospital and Harvard University.

214 Embryonic day 11.5 (E11.5) mouse embryos were isolated from crosses between C57BL/6 mice  
215 heterozygous for a deletion in *Cbx2*, producing *Cbx2*<sup>+/+</sup>, *Cbx2*<sup>+/-</sup>, and *Cbx2*<sup>-/-</sup> progeny. The *Cbx2*  
216 deletion mutant mouse lines arose from CRISPR-mediated modification of *Cbx2* without  
217 homology repair during generation of *Cbx2-KRA* mice<sup>5</sup>, resulting in a premature stop codon at  
218 amino acid position 171 (missense after amino acid 169).

219

### 220 Expression and purification of proteins from Sf9 cells

221 For expression of individual PRC1 subunits from Sf9 cells, cDNAs encoding various PRC1  
222 subunits were cloned into pFastbac1, incorporating an N-terminal FLAG tag. For expression of  
223 monomeric enhanced GFP (mEGFP) and individual mEGFP-tagged PRC1 subunits from Sf9  
224 cells, cDNAs encoding various PRC1 subunits (excluded for mEGFP alone) were cloned into  
225 pFastbac1, incorporating a FLAG tag, the cDNA encoding mEGFP (Addgene plasmid 18696; a  
226 gift of Karel Svoboda), and a seven amino acid linker (GSAAAGS) at the N-terminus. These  
227 constructs were used to generate baculovirus using the Bac-to-Bac system (Thermo Fisher  
228 Scientific). Sf9 cells were infected with baculovirus and incubated with shaking for 72 hours at  
229 27°C to express proteins. For expression of full PRC1 complex, only the CBX2 subunit was  
230 FLAG-tagged. Sf9 cells were harvested by centrifugation and used to prepare nuclear extracts as

231 previously described<sup>32</sup>. Nuclear extract was incubated with anti-FLAG M2 affinity resin (Sigma)  
232 for 2 hours and then washed with BC buffer (20 mM HEPES at pH 7.9, 0.2 mM EDTA, 20%  
233 glycerol, 0.05% NP-40, 0.5 mM DTT, 0.1 mM PMSF, cOmplete EDTA-free protease inhibitor  
234 (Roche)) containing 300 mM KCl. Resin was washed with BC buffer containing increasing  
235 concentrations (300-600-1200-2000 mM) of KCl, and then washed with BC buffer in descending  
236 order of KCl concentration to 300 mM KCl. Proteins were eluted from resin using BC buffer  
237 containing 300 mM KCl and 0.8 mg/mL FLAG peptide. Purified protein was concentrated using  
238 Amicon Ultra-4 centrifugal filter units and quantified by Bradford assay. The purity of  
239 complexes was assessed by Coomassie staining.

240

#### 241 Expression and purification of proteins from *E. coli*

242 For expression of mEGFP-CBX2ΔCbox from *E. coli* cells, cDNA encoding CBX2ΔCbox was  
243 cloned into pET15b, incorporating a FLAG tag and the cDNA encoding mEGFP at the N-  
244 terminus. This vector was used to transform Rosetta (DE3) pLysS *E. coli* for protein purification.  
245 Phosphorylated mEGFP-CBX2ΔCbox was obtained by co-expression with the catalytic subunits  
246 of CKII in a pRSF-Duet vector. Cells were grown to an OD 0.6 at 37°C in 2-YT with 50 µg/mL  
247 carbenicillin and 25 µg/mL chloramphenicol. For co-expression with pRSF-Duet CKII vector, 25  
248 µg/mL kanamycin was added. Cells were induced with 0.5 mM isopropyl β-D-1-  
249 thiogalactopyranoside overnight at 18°C. Cell extracts were prepared as previously described<sup>4</sup>.  
250 Briefly, harvested cells were resuspended in lysis buffer (50 mM HEPES at pH 7.5, 0.5 mM  
251 EDTA, 1.6 M KCl, 20% glycerol, 0.5 mM MgCl<sub>2</sub>, 0.05% NP-40, 1 mg/mL lysozyme, 1 mM  
252 DTT, protease inhibitors). The cells were taken through three freeze–thaw cycles, then sonicated  
253 to shear DNA before centrifugation at 25,000g for 20 minutes to remove debris. Five percent

254 polyethelenimine (PEI) in 20 mM HEPES pH 7.5 was added dropwise to the supernatant while  
255 stirring to a final concentration of 0.15%, and stirred an additional 30 minutes. The precipitated  
256 nucleic acid was removed by centrifugation at 25,000g for 20 minutes. Extracts were bound to  
257 M2 resin and protein purification was carried out as described for Sf9 cells.

258

#### 259 Turbidity assay

260 To measure turbidity of purified proteins, concentrated proteins were serially diluted to the  
261 specified concentrations into buffer containing a final concentration of 20 mM HEPES pH 7.9,  
262 100 mM KCl, and 1 mM MgSO<sub>4</sub>. Diluted proteins were loaded into a clear bottom 384-well  
263 plate (Corning), and absorbance at 405 nm was measured using a Spectramax M3 plate reader.  
264 Turbidity measurements reflect the average of 3 samples.

265

#### 266 Centrifugation assay

267 Serial dilutions of mEGFP-tagged proteins were performed in 0.5 mL microcentrifuge tubes as  
268 described above for untagged proteins in the turbidity assay. The samples were incubated at  
269 room temperature for 5 minutes and then centrifuged at 10,000g for 5 minutes. Material was  
270 visualized under UV light.

271

#### 272 Fluorescence microscopy of *in vitro* protein condensates

273 Prior to imaging, purified mEGFP-tagged proteins were diluted to specified concentrations into  
274 buffer containing a final concentration of 20 mM HEPES pH 7.9, 100 mM KCl, and 1 mM  
275 MgSO<sub>4</sub> and spotted on glass slides with coverslips. Proteins were imaged with a Nikon 90i  
276 Eclipse epifluorescence microscope equipped with an Orca ER camera (Hamamatsu) using a

277 100X oil objective and Volocity software (Perkin Elmer). Images in figures were prepared using  
278 Fiji software.

279

#### 280 Generation of cell lines for doxycycline-inducible expression of mEGFP-CBX2 variants

281 cDNAs encoding mEGFP and mEGFP-CBX2 variants were cloned into a modified pTRIPZ  
282 vector (Dharmacon). In the modified vector, the RFP and shRNA encoding segments were  
283 removed by restriction digest with AgeI and MluI and replaced with a multiple cloning site.  
284 pTRIPZ vectors expressing mEGFP and mEGFP-CBX2 variants were transfected into HEK293T  
285 in combination with pCMV-dR8.91 containing gag, pol, and rev genes and pMD2.G encoding  
286 VSV-G envelope protein using TransIT-Lenti transfection reagent (Mirus). After 48 hours,  
287 medium was collected and filtered through a 0.45 µm filter. Filtered medium was concentrated  
288 using Lenti-X concentrator (Takara) and concentrated lentivirus was resuspended in Opti-MEM  
289 (Thermo Fisher Scientific). NIH-3T3 fibroblasts were transduced with lentivirus at low  
290 multiplicity of infection. After 48 hours, transduced cells were selected with puromycin at a final  
291 concentration of 2 µg/mL. After selection, stably transduced 3T3 cells were maintained as  
292 detailed above.

293

#### 294 Fluorescence microscopy of doxycycline-inducible cell lines

295 For fixed cell experiments, transduced 3T3 fibroblasts were grown on coverslips. To induce  
296 expression of mEGFP and mEGFP-CBX2 variant fusions, media containing the indicated  
297 concentration of doxycycline (Sigma) was added for 24 hours. Coverslips were washed with PBS  
298 and then crosslinked with 4% formaldehyde in PBS for 15 minutes. The formaldehyde was  
299 removed and coverslips were washed twice with PBS. Coverslips were mounted on slides with

300 mounting media containing DAPI (Vector Laboratories, Vectashield H-1200) and imaged with a  
301 Nikon 90i Eclipse microscope equipped with an Orca ER camera (Hamamatsu) using a 60X oil  
302 objective and Volocity software (Perkin Elmer). A Z-stack of images was collected with 0.2  $\mu\text{m}$   
303 spacing and collapsed using maximum intensity. Images in figures were prepared using Fiji  
304 software. For live cell imaging, cells were grown on 35 mm glass bottom fluorodishes (WPI) in  
305 phenol red free media and induced with 500 ng/mL of doxycycline for 24 hours. Cells were  
306 imaged using a Nikon A1R laser-scanning confocal inverted microscope equipped with a  
307 thermostatically controlled stage maintained at 37°C with a 63X oil immersion objective. A Z-  
308 stack of images was collected with 0.5  $\mu\text{m}$  spacing and collapsed using maximum intensity. For  
309 high content imaging and unbiased quantification of nuclear puncta, transduced 3T3 fibroblasts  
310 were grown in black-walled, poly-L-lysine-coated 96 well microplates (Greiner, 655090) and  
311 induced with indicated concentration of doxycycline for 24 hours. The cells were fixed as  
312 described above for coverslips and stained with Hoechst 33342 (Thermo Fisher Scientific,  
313 H3570). Images were acquired on the Opera Phenix High Content Screening System (Perkin  
314 Elmer). Confocal images with 4 stacks per field and 28 fields per well were automatically  
315 acquired using a 63X water objective. Three replicates per cell line and doxycycline  
316 concentration were included in each experiment. At least 500 cells were analyzed for each  
317 experimental group. Image segmentation, nuclei and spot identification per cell, and  
318 quantification was performed using the Columbus Data Storage and Analysis System (Perkin  
319 Elmer). After running the spot-finding script on wells without doxycycline, the raw spot  
320 intensities were averaged and standard deviation calculated. Mean of intensities plus two  
321 standard deviations was applied as the intensity threshold for identifying positive spots in all the

322 wells. Statistically significant differences in the distributions of puncta per cell for each  
323 doxycycline treatment were assessed using a two-tailed Mann-Whitney *U* test.

324

#### 325 Co-immunoprecipitation of mEGFP-CBX2 variants

326 Transduced 3T3 fibroblasts containing mEGFP, mEGFP-CBX2 or mEGFP-CBX2-23KRA were  
327 grown to 80% confluency in 15 cm tissue culture dishes. Media containing 500 ng/mL of  
328 doxycycline was added for 24 hours. Cells were washed with PBS and collected using a cell  
329 scraper. Nuclear extracts were prepared as previously described<sup>32</sup>. Protein levels in nuclear  
330 extracts were measured on a Nanodrop using A280. Equal protein mass between samples was  
331 used in subsequent co-immunoprecipitation (co-IP). 1% volume was saved as input. For co-IP,  
332 magnetic protein A beads (Invitrogen) were pre-equilibrated in BC buffer containing 300 mM  
333 KCl and 0.05% NP-40. Washes were performed on a magnetic rack. 2.5 µg of GFP antisera  
334 (Abcam, ab290) for each IP was conjugated to pre-equilibrated beads by incubating for 1 hour at  
335 4°C. GFP antisera conjugated beads were washed three times with BC buffer containing 300 mM  
336 KCl and 0.05% NP-40 and mixed with nuclear extracts for 2 hours at 4°C. IPs were washed three  
337 times with BC buffer containing 300 mM KCl and 0.05% NP-40 and resuspended in 1X SDS-  
338 sample buffer. Samples were heated to 95°C for 5 minutes and supernatant was loaded onto an  
339 SDS 4-20% polyacrylamide gel (Biorad). Samples were either processed for mass spectrometry  
340 or immunoblotting.

341

#### 342 Mass spectrometry

343 To detect proteins associated with mEGFP-CBX2 variants by mass spectrometry, co-  
344 immunoprecipitated material was run on an SDS polyacrylamide gel and Coomassie stained.

345 Four gel sections were excised for each immunoprecipitation. Gel sections were minced and  
346 subjected to a modified in-gel trypsin digestion procedure<sup>33</sup>. Gel pieces were dehydrated with  
347 acetonitrile and dried to completion in a SpeedVac. Gel pieces were rehydrated with 50 mM  
348 ammonium bicarbonate supplemented with 12.5 ng/μl modified sequencing-grade trypsin  
349 (Promega) at 4°C. Rehydrated samples were then incubated at 37°C overnight. Peptides were  
350 extracted by removing the ammonium bicarbonate solution, washed with a solution of 50%  
351 acetonitrile and 1% formic acid, and dried in a SpeedVac. Dried samples were reconstituted in  
352 HPLC solvent A (2.5% acetonitrile, 0.1% formic acid). Samples were loaded onto a reverse-  
353 phase HPLC capillary column packed with 2.6 μm C18 spherical silica beads into a fused silica  
354 capillary<sup>34</sup>. After gradient formation, peptides were eluted with increasing concentrations of  
355 HPLC solvent B (97.5% acetonitrile, 0.1% formic acid). Eluted peptides were subjected to  
356 electrospray ionization and entered an LTQ Orbitrap Velos Pro ion-trap mass spectrometer  
357 (Thermo Fisher Scientific). Peptides were detected, isolated, and fragmented to produce a  
358 tandem mass spectrum of specific fragment ions for each peptide. Peptide sequences were  
359 identified using Sequest<sup>35</sup>. All databases include a reversed version of all the sequences. Data  
360 were filtered to between a 1-2% peptide false discovery rate.

361 To identify phosphorylated residues within CBX2 purified from *E. coli* and Sf9 cells,  
362 purified protein was run on an SDS polyacrylamide gel and Coomassie stained. A band  
363 corresponding to the molecular weight of tagged CBX2 was excised from the gel and analyzed  
364 by mass spectrometry as above, with the following alterations. Prior to in-gel trypsin digestion,  
365 minced gel pieces were reduced with 1 mM DTT for 30 minutes at 60°C followed by alkylation  
366 with 5 mM iodoacetamide for 15 minutes in the dark at room temperature. During mass  
367 spectrometry analysis, a modification of 79.9663 mass units to serine, threonine, and tyrosine



368 was included in the database searches to determine phosphopeptides. Phosphorylation  
369 assignments were determined by the Ascore algorithm<sup>36</sup>.

370

### 371 Immunofluorescence

372 Fixed cells on coverslips were washed once with PBS, then permeabilized in PBS with 0.2%  
373 Triton X-100 for 15 minutes. After permeabilization, cells on the coverslip were blocked for 30  
374 minutes with incubation solution (PBS with 3% BSA, 0.05% Triton X-100). Coverslips were  
375 then incubated with incubation solution containing primary antibodies (anti-RING1b (Bethyl,  
376 A302-869A, 1:4500) or anti-RING1b (Abcam, ab3832, 1:900)) overnight at 4°C in the dark to  
377 minimize bleaching of GFP fluorescence. Coverslips were washed three times with PBS with  
378 0.1% Tween-20, then incubated with incubation solution containing secondary antibodies  
379 (Alexa-568 conjugated anti-rabbit, or Cy3 conjugated anti-goat, both 1:500) for two hours in the  
380 dark. After three washes with PBS containing 0.1% Tween-20, coverslips were rinsed with  
381 distilled water and mounted on slides with mounting medium containing DAPI. All incubations  
382 and washes were done at room temperature except incubation with primary antibody. Slides were  
383 imaged with a Nikon 90i Eclipse microscope as described above.

384

### 385 Fluorescence recovery after photobleaching (FRAP)

386 FRAP was performed on a Nikon A1R laser-scanning confocal inverted microscope as described  
387 above for live cell imaging of 3T3 fibroblasts transduced with mEGFP-CBX2 and induced with  
388 500 ng/mL of doxycycline. Images were acquired every 2 seconds for 90 seconds (45 frames).  
389 The first five frames were collected before the bleach pulse for baseline fluorescence. A circular  
390 region of interest (ROI) with a radius of 0.5-1  $\mu\text{m}$  was selected for bleaching puncta with 100%

391 laser power (488 nm). Fluorescent intensities and images analysis was done using Fiji software.  
392 FRAP curves were generated as previously described<sup>22</sup> using three step normalization. First, the  
393 mean intensity of the bleach spot and the whole nucleus at each time point was normalized to the  
394 respective pre-bleach baseline intensity. Second, the relative bleach spot intensity was  
395 normalized to the relative nuclear intensity. Finally, the difference between the double-  
396 normalized FRAP intensity before and at the first frame after bleach pulse was calculated and  
397 normalized to 100%. FRAP recovery measurements were averaged over 15 replicates spanning  
398 multiple cells. Immobile fraction was estimated as percent fluorescence intensity unrecovered at  
399 last frame.

400

#### 401 Hexanediol treatments

402 Live cell imaging was performed as described above for 3T3 fibroblasts transduced with  
403 mEGFP-CBX2 and induced with 500 ng/mL of doxycycline. Images were acquired every 8  
404 seconds for 600 seconds (75 frames). After 1 minute and as image acquisition was ongoing, 1,6-  
405 hexanediol diluted in media was added to a final concentration of 10%. In control experiments,  
406 an equal volume of media alone is added. The time of 1,6-hexanediol addition is time 0'' and the  
407 first frame after addition is time 16''. Image analysis was done using Fiji.

408

#### 409 Preparation of Cy5-labeled ligands and incorporation into condensates

410 For visualization of DNA incorporation into condensates, the G5E4 nucleosome-positioning  
411 array<sup>23</sup> was labeled with Cy5. The G5E4 array was excised from pG5E4 by restriction digest  
412 with Asp718, ClaI, DdeI and DraIII and purified by PEG precipitation. The excised fragment

413 was end labeled using Klenow Fragment (New England Biolabs) to incorporate Cy5-dCTP into  
414 the G5E4 array.

415 For visualization of RNA incorporation into condensates, templates for *in vitro*  
416 transcription of CAT7 RNA<sup>25</sup> were generated. The DNA sequence encoding CAT7 was  
417 amplified from human genomic DNA using primers incorporating a T7 promoter and  
418 subsequently cloned into pUC19. DNA templates for *in vitro* transcription were prepared by  
419 SmaI digest of the pUC19 vector containing T7-CAT7, followed by ethanol precipitation. *In*  
420 *vitro* transcription was performed with the MEGAscript T7 kit (Ambion), incorporating trace  
421 Cy5-UTP into the reaction. *In vitro* transcription proceeded for 4 hours at 37°C, followed by  
422 digestion of template DNA with DNase I for 30 minutes at 37°C. RNA was purified using a  
423 MEGAclean kit (Ambion).

424 For visualization of polynucleosome and MLA polynucleosome incorporation into  
425 condensates, HeLa nucleosomes were isolated as previously described<sup>37</sup> and MLA nucleosomes  
426 containing an H3K27me3 analog were assembled as described<sup>24</sup>. HeLa and MLA nucleosomes  
427 were assembled onto Cy5-labeled G5E4 nucleosome-positioning arrays by salt dialysis as  
428 previously described<sup>38</sup>. Proper assembly of polynucleosome arrays was confirmed by EcoRI  
429 digest to visualize mononucleosomes and HhaI digest to assess the extent of occupancy of the  
430 central core of the array lacking nucleosome positioning sequences.

431 To assess incorporation of Cy5-labeled ligands into *in vitro* protein condensates, purified  
432 mEGFP fusion proteins were diluted into buffer as described above. Cy5-labeled ligands were  
433 added to pre-formed condensates to a final concentration of 0.3  $\mu$ M. Contemporaneous  
434 incorporation of ligands into condensates was assessed by adding Cy5-labeled ligands to purified

435 mEGFP fusion proteins prior to condensate formation. *In vitro* condensates were visualized by  
436 fluorescence microscopy as described above.

437

#### 438 Analysis of protein disorder and charge

439 Predicted protein disorder for CBX2 was calculated using the PONDR VSL2 algorithm<sup>39</sup>.

440 Protein charge distribution was calculated for CBX2 variants using the EMBOSS charge

441 algorithm<sup>40</sup> with default parameters using a window size of 10 residues.

442

#### 443 Immunoblot analysis

444 The indicated cell lines were induced with the specified concentration of doxycycline for 24

445 hours, cells were lysed in RIPA buffer (Thermo Fisher Scientific, 89900), and protein was

446 quantified by Bradford assay. Samples were run on SDS 4-20% polyacrylamide gels (Biorad)

447 and transferred to nitrocellulose membranes. After transfer, membranes were blocked with 5%

448 milk in TBS with 0.1% Tween-20 for 1 hour at room temperature. Membranes were incubated

449 with anti-CBX2 (Santa Cruz, sc19297, 1:500) or anti-GAPDH (Santa Cruz, sc32233, 1:2500)

450 diluted in 2% milk in TBS with 0.1% Tween-20 overnight at 4°C. After washing three times

451 with TBS with 0.1% Tween-20 for 5 minutes at room temperature, membranes were incubated

452 with secondary antibody conjugated to HRP (1:20,000) diluted in 1% milk in TBS with 0.1%

453 Tween-20 for 1 hour at room temperature. Membranes were washed three times with TBS with

454 0.1% Tween-20 for 5 minutes at room temperature and developed with SuperSignal West Pico

455 PLUS Chemiluminescent Substrate (Thermo Fisher Scientific, 34577) and imaged using a

456 Chemidoc (Biorad) or film. Quantification was done using Fiji software and relative expression

457 level was normalized to 1 for CBX2 at each doxycycline concentration. For analysis of proteins

458 obtained by co-IP, membrane was incubated with anti-GFP-HRP (Abcam, ab184207, 1:10,000),  
459 anti-CBX2 (Santa Cruz, sc19297, 1:500), anti-RING1b (Bethyl, A302-869A, 1:5,000), or anti-  
460 PHC1 (Active Motif, 39723, 1:1,000) and processed as above (note the secondary antibody step  
461 was omitted for anti-GFP-HRP blotted membranes). All co-IP membranes were imaged using a  
462 Chemidoc (Biorad). To compare expression of different CBX paralogs, CJ7 mESCs and E11.5  
463 *Cbx2*<sup>+/+</sup>, *Cbx2*<sup>+/-</sup>, and *Cbx2*<sup>-/-</sup> mouse embryos were examined in comparison to 3T3 fibroblasts.  
464 Embryos were homogenized by running through a 25G needle >10 times using a syringe and  
465 lysates were generated as above. Membranes were first stained with Ponceau prior to incubation  
466 with anti-CBX2 (Santa Cruz, sc19297, 1:500), anti-CBX4 (Millipore, MAB11012, 1:2000), anti-  
467 CBX7 (Santa Cruz, sc376274, 1:1000), or anti-CBX8 (Bethyl, A300-882A, 1:3000) and  
468 processed as above and imaged on film.

469

470 **Data Availability:** The data that support the findings of this study are available from the  
471 corresponding author upon reasonable request.

472

## 473 **References**

- 474 1. Di Croce, L. & Helin, K. Transcriptional regulation by Polycomb group proteins. *Nat. Struct.*  
475 *Mol. Biol.* **20**, 1147–1155 (2013).
- 476 2. Satijn, D. P. *et al.* RING1 is associated with the polycomb group protein complex and acts as  
477 a transcriptional repressor. *Mol. Cell. Biol.* **17**, 4105–4113 (1997).
- 478 3. Saurin, A. J. *et al.* The Human Polycomb Group Complex Associates with Pericentromeric  
479 Heterochromatin to Form a Novel Nuclear Domain. *J. Cell Biol.* **142**, 887–898 (1998).

- 480 4. Grau, D. J. *et al.* Compaction of chromatin by diverse Polycomb group proteins requires  
481 localized regions of high charge. *Genes Dev.* **25**, 2210–2221 (2011).
- 482 5. Lau, M. S. *et al.* Mutation of a nucleosome compaction region disrupts Polycomb-mediated  
483 axial patterning. *Science* **355**, 1081–1084 (2017).
- 484 6. Larson, A. G. *et al.* Liquid droplet formation by HP1 $\alpha$  suggests a role for phase separation in  
485 heterochromatin. *Nature* **547**, 236–240 (2017).
- 486 7. Strom, A. R. *et al.* Phase separation drives heterochromatin domain formation. *Nature* **547**,  
487 241–245 (2017).
- 488 8. Schwartz, J. C., Wang, X., Podell, E. R. & Cech, T. R. RNA Seeds Higher-Order Assembly  
489 of FUS Protein. *Cell Rep.* **5**, 918–925 (2013).
- 490 9. Zacharias, D. A., Violin, J. D., Newton, A. C. & Tsien, R. Y. Partitioning of Lipid-Modified  
491 Monomeric GFPs into Membrane Microdomains of Live Cells. *Science* **296**, 913–916  
492 (2002).
- 493 10. Brangwynne, C. P. Phase transitions and size scaling of membrane-less organelles. *J Cell*  
494 *Biol* **203**, 875–881 (2013).
- 495 11. Shin, Y. & Brangwynne, C. P. Liquid phase condensation in cell physiology and disease.  
496 *Science* **357**, eaaf4382 (2017).
- 497 12. Lu, H. *et al.* Phase-separation mechanism for C-terminal hyperphosphorylation of RNA  
498 polymerase II. *Nature* **558**, 318–323 (2018).
- 499 13. Kwon, I. *et al.* Phosphorylation-Regulated Binding of RNA Polymerase II to Fibrous  
500 Polymers of Low-Complexity Domains. *Cell* **155**, 1049–1060 (2013).
- 501 14. Monahan, Z. *et al.* Phosphorylation of the FUS low-complexity domain disrupts phase  
502 separation, aggregation, and toxicity. *EMBO J.* **36**, 2951–2967 (2017).

- 503 15. Boehning, M. *et al.* RNA polymerase II clustering through carboxy-terminal domain phase  
504 separation. *Nat. Struct. Mol. Biol.* 1 (2018). doi:10.1038/s41594-018-0112-y
- 505 16. Kawaguchi, T., Machida, S., Kurumizaka, H., Tagami, H. & Nakayama, J. Phosphorylation  
506 of CBX2 controls its nucleosome-binding specificity. *J. Biochem. (Tokyo)* **162**, 343–355  
507 (2017).
- 508 17. Zhen, C. Y. *et al.* Cbx2 stably associates with mitotic chromosomes via a PRC2- or PRC1-  
509 independent mechanism and is needed for recruiting PRC1 complex to mitotic  
510 chromosomes. *Mol. Biol. Cell* **25**, 3726–3739 (2014).
- 511 18. Tardat, M. *et al.* Cbx2 Targets PRC1 to Constitutive Heterochromatin in Mouse Zygotes in a  
512 Parent-of-Origin-Dependent Manner. *Mol. Cell* **58**, 157–171 (2015).
- 513 19. Hyman, A. A., Weber, C. A. & Jülicher, F. Liquid-Liquid Phase Separation in Biology.  
514 *Annu. Rev. Cell Dev. Biol.* **30**, 39–58 (2014).
- 515 20. Sabari, B. R. *et al.* Coactivator condensation at super-enhancers links phase separation and  
516 gene control. *Science* **361**, eaar3958 (2018).
- 517 21. Cho, W.-K. *et al.* Mediator and RNA polymerase II clusters associate in transcription-  
518 dependent condensates. *Science* **361**, 412–415 (2018).
- 519 22. Chong, S. *et al.* Imaging dynamic and selective low-complexity domain interactions that  
520 control gene transcription. *Science* **361**, eaar2555 (2018).
- 521 23. Utley, R. T. *et al.* Transcriptional activators direct histone acetyltransferase complexes to  
522 nucleosomes. *Nature* **394**, 498–502 (1998).
- 523 24. Simon, M. D. *et al.* The Site-Specific Installation of Methyl-Lysine Analogs into  
524 Recombinant Histones. *Cell* **128**, 1003–1012 (2007).

- 525 25. Ray, M. K. *et al.* CAT7 and cat7l Long Non-coding RNAs Tune Polycomb Repressive  
526 Complex 1 Function during Human and Zebrafish Development. *J. Biol. Chem.* **291**, 19558–  
527 19572 (2016).
- 528 26. Bernstein, E. *et al.* Mouse Polycomb Proteins Bind Differentially to Methylated Histone H3  
529 and RNA and Are Enriched in Facultative Heterochromatin. *Mol. Cell. Biol.* **26**, 2560–2569  
530 (2006).
- 531 27. Isono, K. *et al.* SAM Domain Polymerization Links Subnuclear Clustering of PRC1 to Gene  
532 Silencing. *Dev. Cell* **26**, 565–577 (2013).
- 533 28. Wani, A. H. *et al.* Chromatin topology is coupled to Polycomb group protein subnuclear  
534 organization. *Nat. Commun.* **7**, 10291 (2016).
- 535 29. Kundu, S. *et al.* Polycomb Repressive Complex 1 Generates Discrete Compacted Domains  
536 that Change during Differentiation. *Mol. Cell* **65**, 432-446.e5 (2017).
- 537 30. Wang, J. *et al.* A Molecular Grammar Governing the Driving Forces for Phase Separation of  
538 Prion-like RNA Binding Proteins. *Cell* **174**, 688-699.e16 (2018).
- 539 31. Shen, X. *et al.* EZH1 Mediates Methylation on Histone H3 Lysine 27 and Complements  
540 EZH2 in Maintaining Stem Cell Identity and Executing Pluripotency. *Mol. Cell* **32**, 491–502  
541 (2008).
- 542 32. Abmayr, S. M., Yao, T., Parmely, T. & Workman, J. L. Preparation of Nuclear and  
543 Cytoplasmic Extracts from Mammalian Cells. *Curr. Protoc. Mol. Biol.* **75**, 12.1.1-12.1.10  
544 (2006).
- 545 33. Shevchenko, A., Wilm, M., Vorm, O. & Mann, M. Mass Spectrometric Sequencing of  
546 Proteins from Silver-Stained Polyacrylamide Gels. *Anal. Chem.* **68**, 850–858 (1996).



- 547 34. Peng, J. & Gygi, S. P. Proteomics: the move to mixtures. *J. Mass Spectrom.* **36**, 1083–1091  
548 (2001).
- 549 35. Eng, J. K., McCormack, A. L. & Yates, J. R. An approach to correlate tandem mass spectral  
550 data of peptides with amino acid sequences in a protein database. *J. Am. Soc. Mass  
551 Spectrom.* **5**, 976–989 (1994).
- 552 36. Beausoleil, S. A., Villén, J., Gerber, S. A., Rush, J. & Gygi, S. P. A probability-based  
553 approach for high-throughput protein phosphorylation analysis and site localization. *Nat.  
554 Biotechnol.* **24**, 1285–1292 (2006).
- 555 37. Schnitzler, G. R. Isolation of Histones and Nucleosome Cores from Mammalian Cells. *Curr.  
556 Protoc. Mol. Biol.* **50**, 21.5.1-21.5.12 (2000).
- 557 38. Lee, K.-M. & Narlikar, G. Assembly of Nucleosomal Templates by Salt Dialysis. *Curr.  
558 Protoc. Mol. Biol.* **54**, 21.6.1-21.6.16 (2001).
- 559 39. Peng, K., Radivojac, P., Vucetic, S., Dunker, A. K. & Obradovic, Z. Length-dependent  
560 prediction of protein intrinsic disorder. *BMC Bioinformatics* **7**, 208 (2006).
- 561 40. Rice, P., Longden, I. & Bleasby, A. EMBOSS: The European Molecular Biology Open  
562 Software Suite. *Trends Genet.* **16**, 276–277 (2000).

563

#### 564 **End notes**

565 **Supplementary Information** is available in the online version of the paper.

566

567 **Acknowledgments** We thank G. Narlikar for advice initiating this project; R. Tomaino at the  
568 Taplin Mass Spectrometry Facility for all mass spectrometry analysis; J. Lee laboratory, the  
569 MGH Program in Membrane Biology (PMB) microscopy core, and M. Alimova at the Broad

570 Institute of Harvard and MIT for help with and access to microscopes; L. Rubin laboratory for  
571 imaging software; the R.E.K. laboratory for fruitful discussions; and M.B. Ardehali, E. Jaensch,  
572 T. Oei, I. Tchasovnikarova and C. Tsokos for critical reading of the manuscript. This work was  
573 supported by the NIH (F32GM109693 to A.J.P. and R01GM04390 to R.E.K.) and graduate  
574 fellowships from the National Science Foundation and Albert J. Ryan Foundation to C.P.D.

575

576 **Author contributions** A.J.P., C.P.D. and R.E.K. designed the project. A.J.P. and C.P.D. created  
577 plasmids, purified proteins and did all sample preparation for microscopy and mass  
578 spectrometry. A.J.P. conducted all *in vitro* work, microscopy and Co-IPs. C.P.D. created cell  
579 lines and performed protein domain analysis. A.J.P. and J.K. performed immunoblotting. J.K.  
580 performed immunofluorescence. G.R. performed high-content imaging analysis. M.M.K.  
581 provided the CKII plasmid and advised on phosphorylation experiments. S.K.M generated MLA  
582 nucleosomes and labeled DNA constructs for arrays. A.J.P., C.P.D. and R.E.K. wrote the  
583 manuscript.

584

585 **Author Information** The authors declare no competing interests. Correspondence and requests  
586 for materials should be addressed to R.E.K ([kingston@molbio.mgh.harvard.edu](mailto:kingston@molbio.mgh.harvard.edu)).

587

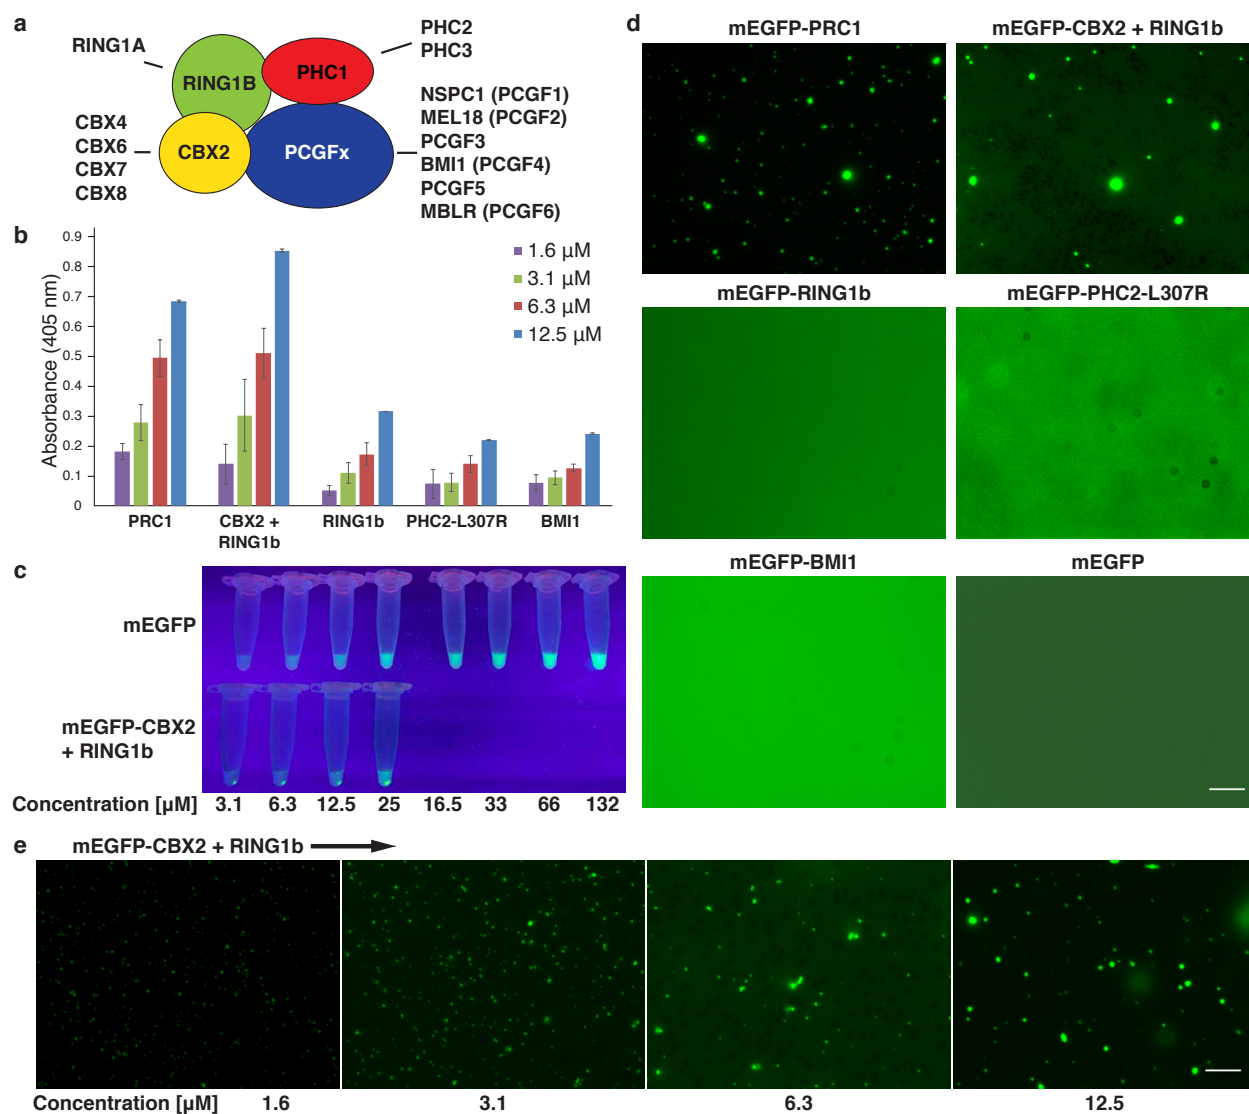

588

589 **Figure 1: PRC1 phase separates *in vitro*.** **a**, Schematic of canonical PRC1 subunits. **b**, Turbid  
590 solutions of individual PRC1 subunits at increasing protein concentration were measured at  
591 absorbance 405 nm. All proteins are wild type except PHC2-L307R which contains a point  
592 mutation in the SAM domain required for expression and purification. **c**, Spin down assay of  
593 mEGFP and mEGFP-CBX2 + RING1b to visualize separation of high concentration condensates  
594 at increasing protein concentration. **d**, Micrographs of mEGFP-tagged PRC1 subunits at 6.3  $\mu\text{M}$   
595 protein concentration in buffer containing 20 mM HEPES pH 7.9, 100 mM KCl, 1 mM  $\text{MgSO}_4$ .  
596 For each experiment a representative micrograph from two independent protein preparations is  
597 shown. **e**, Micrographs of mEGFP-CBX2 + RING1b at indicated  $\mu\text{M}$  protein concentration.  
598 Scale bars = 10  $\mu\text{m}$ .

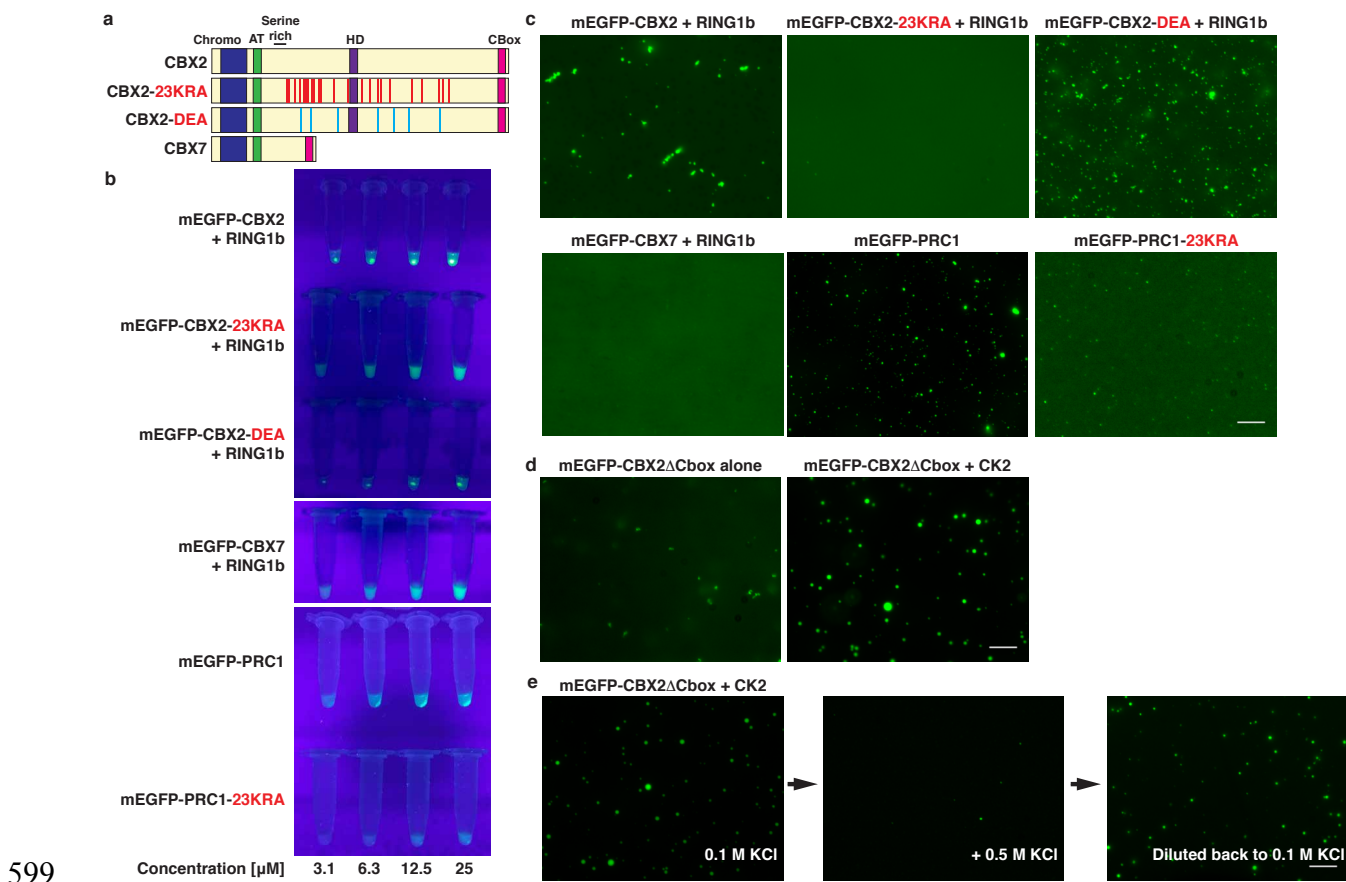

600 **Figure 2: Low-complexity disordered region (LCDR) of CBX2 mediates phase separation**  
601 ***in vitro*.** **a**, Schematic of CBX2 mutants and CBX7 protein domains. Point-mutated residues in  
602 CBX2-23KRA and CBX2-DEA are highlighted in red and blue, respectively. **b**, Spin down assay  
603 of mEGFP-tagged CBX2 mutants and CBX7 + RING1b heterodimers, and full PRC1 complexes  
604 to visualize separation of high concentration condensates at increasing protein concentration.  
605 **c**, Micrographs of mEGFP-tagged CBX2 mutants and CBX7 + RING1b heterodimers, and full  
606 PRC1 complexes all at 6.3  $\mu\text{M}$ . For each experiment a representative micrograph from two  
607 independent protein preparations is shown. **d**, Micrographs of mEGFP-CBX2 $\Delta$ Cbox alone  
608 (unphosphorylated) (12.5  $\mu\text{M}$ ) or from cells co-expressing catalytic subunits of casein kinase II  
609 (CK2) (phosphorylated) (12.5  $\mu\text{M}$ ). **e**, Micrographs of salt-dependent reversibility assay.  
610 Phosphorylated mEGFP-CBX2 $\Delta$ Cbox (12.5  $\mu\text{M}$ ) in buffer containing 100 mM KCl, followed by  
611 buffer containing 500 mM KCl and then diluted back to 100 mM KCl. Scale bars = 10  $\mu\text{m}$ .

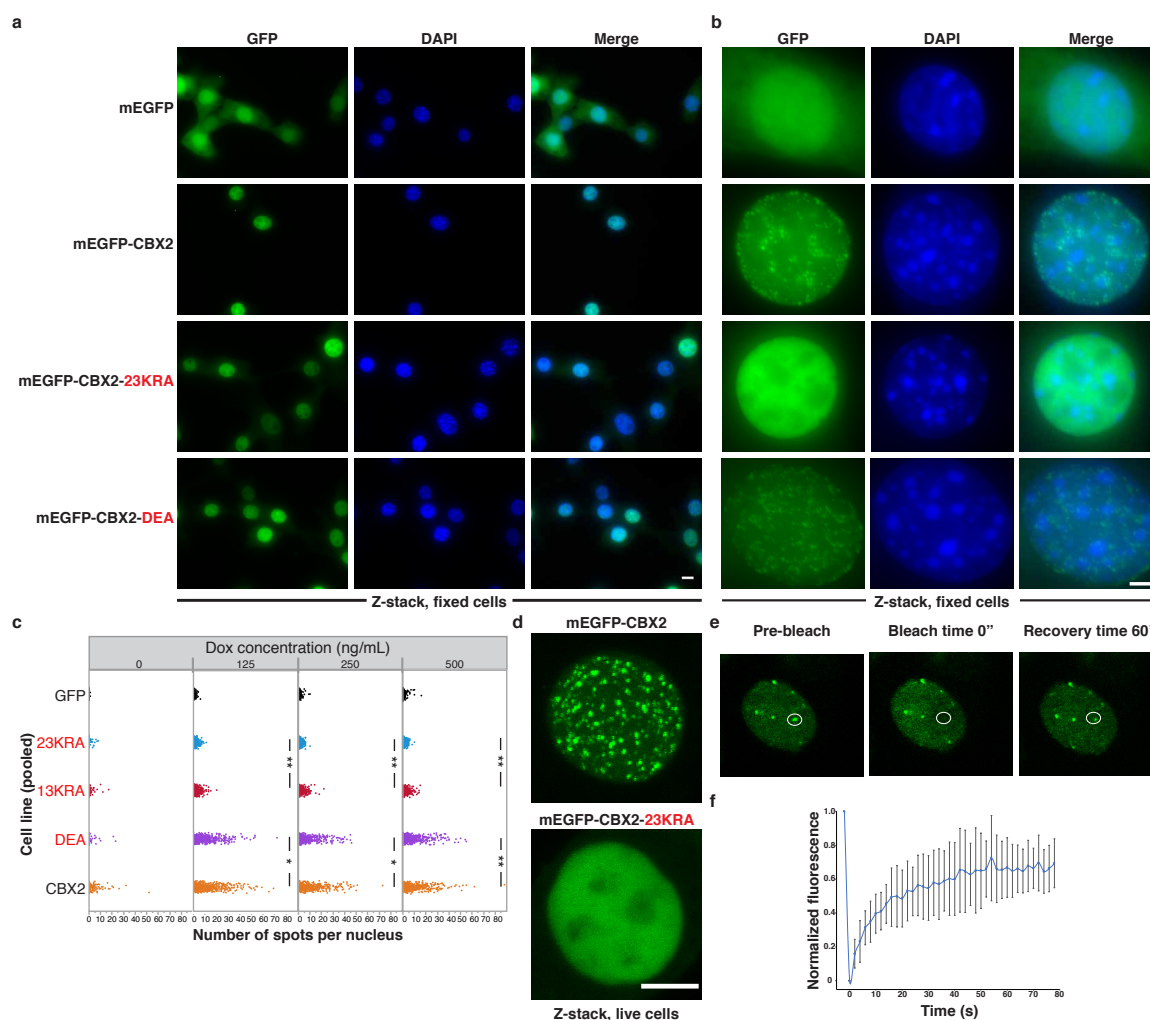

612

613 **Figure 3: PRC1 proteins form punctate structures *in vivo*.** **a**, Representative micrographs of  
 614 3T3 fibroblasts after 500 ng/mL doxycycline induction. The mEGFP construct in each cell line is  
 615 indicated. Column panels from left to right are the GFP channel, DAPI channel and merged  
 616 images. Scale bar = 10  $\mu\text{m}$ . All cell images are of Z-stacks using formaldehyde fixed cells. **b**,  
 617 Zoomed in images of representative nuclei from (a) showing puncta or diffuse signal pattern of  
 618 mEGFP fusion constructs. Scale bar = 5  $\mu\text{m}$ . **c**, High content imaging quantification for the  
 619 distribution of the number of spots per nucleus from three pooled replicates for indicated 3T3  
 620 cell line expressing mEGFP-tagged CBX2 variants at indicated doxycycline concentration. P-  
 621 value thresholds for statistically significant differences in the distributions of puncta per cell for  
 622 each doxycycline treatment, as assessed using a two-tailed Mann-Whitney  $U$  test, are indicated  
 623 with asterisks (\* indicates  $p$ -value  $\leq 0.01$ , \*\* indicates  $p$ -value  $\leq 0.0001$ ). All other combinations  
 624 (not shown) have a  $p$ -value  $\leq 0.0001$  when doxycycline is present. **d**, Representative  
 625 micrographs of live 3T3 fibroblasts expressing mEGFP-CBX2 or mEGFP-CBX2-23KRA after  
 626 500 ng/mL doxycycline induction. Images are max projections of Z-stacks. Scale bar = 5  $\mu\text{m}$ . **e**,  
 627 Representative images of FRAP experiment with mEGFP-CBX2 after 500 ng/mL doxycycline  
 628 induction in 3T3 fibroblasts. White circle indicates bleached region of interest (ROI) over  
 629 puncta. **f**, Quantification of FRAP data of mEGFP-CBX2. FRAP curve was generated as the  
 630 mean of  $n = 15$  puncta. Error bars represent standard deviation.

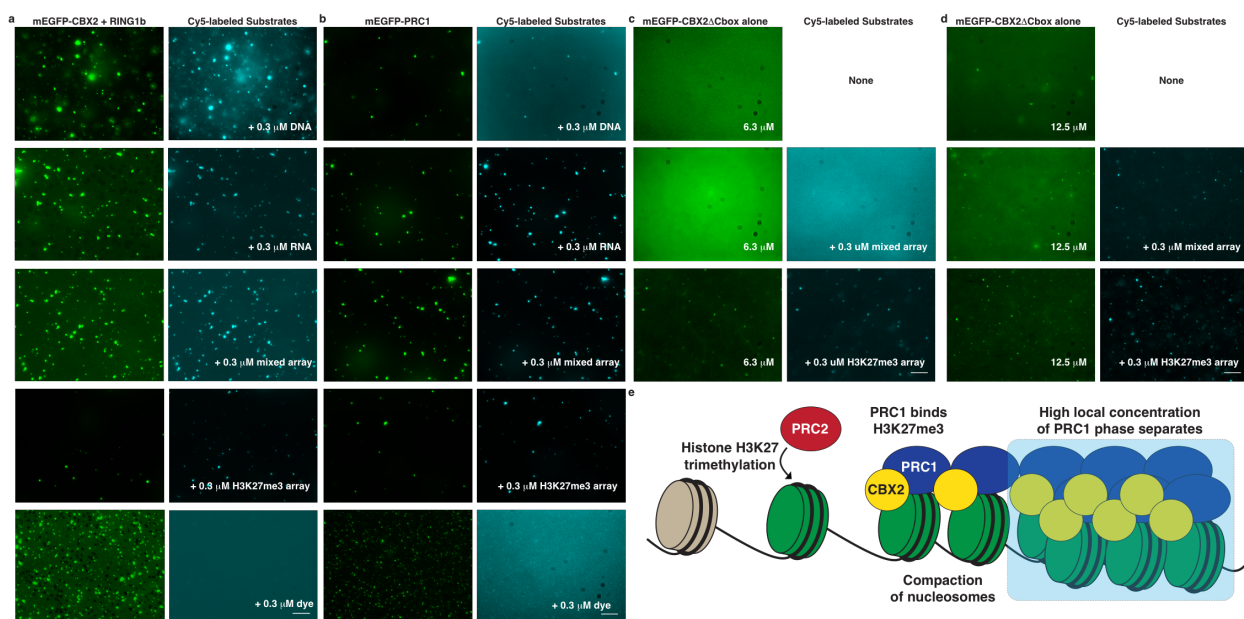

631

632 **Figure 4: PRC1 ligands partition into condensates with PRC1.** a, Micrographs of mEGFP-  
 633 CBX2 + RING1b (6.3  $\mu$ M) with indicated Cy5-labeled substrate (0.3  $\mu$ M). Left panels are GFP  
 634 channel and right panels are Cy5 channel. b, Micrographs of mEGFP-PRC1 (6.3  $\mu$ M) with  
 635 indicated Cy5-labeled substrates (0.3  $\mu$ M). Panels are the same as for (A). c, Micrographs of  
 636 unphosphorylated mEGFP-CBX2 $\Delta$ Cbox (6.3  $\mu$ M) alone (top) or with indicated Cy5-labeled  
 637 heterogeneously modified (mixed) or H3K27me3-modified polynucleosomes (0.3  $\mu$ M). d,  
 638 Same as in (c) with higher concentration of unphosphorylated mEGFP-CBX2 $\Delta$ Cbox (12.5  $\mu$ M). Scale  
 639 bar = 10  $\mu$ m. e, Model of PRC1 nucleosome compaction and phase separation.



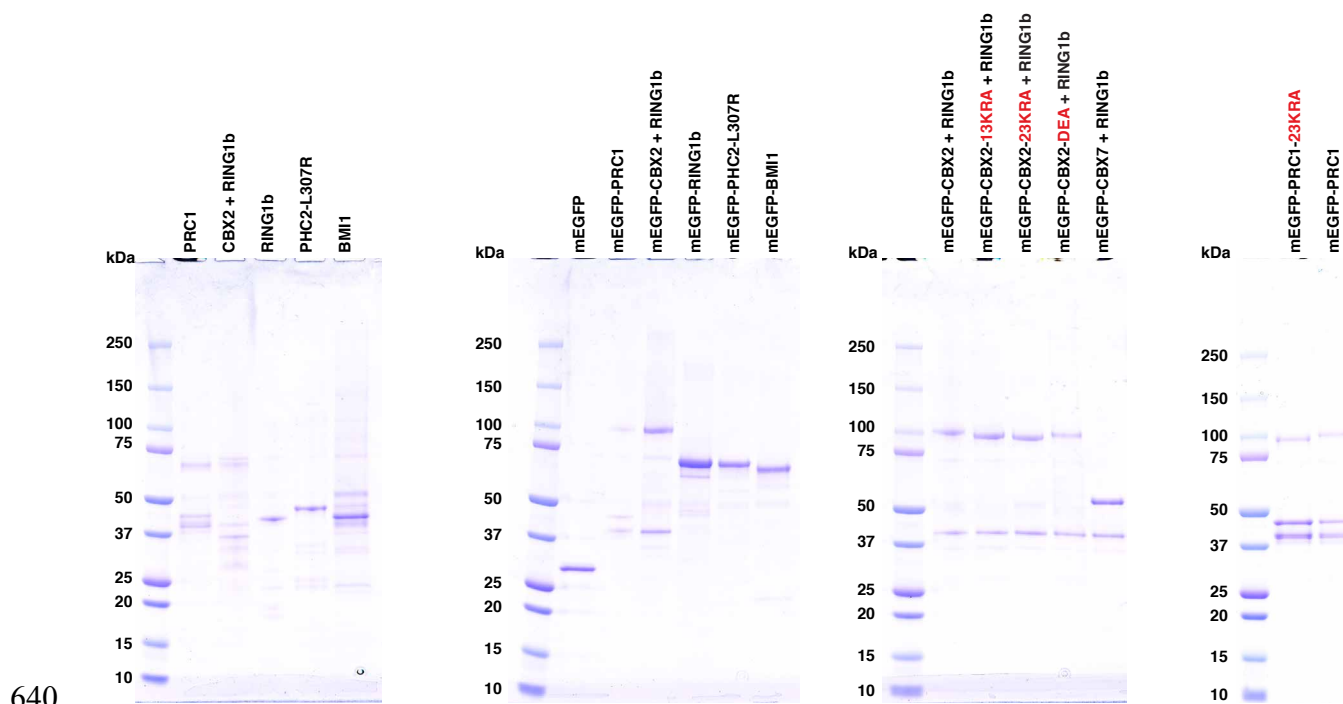

640

641 **Extended Data Figure 1: Purified PRC1 proteins.**

642 Panels from left to right are Coomassie stained SDS-polyacrylamide gels of purified recombinant  
643 untagged PRC1 subunits, purified recombinant mEGFP-tagged PRC1 subunits, purified  
644 recombinant mEGFP-tagged CBX + RING1b heterodimers and purified recombinant mEGFP-  
645 tagged PRC1 complexes.

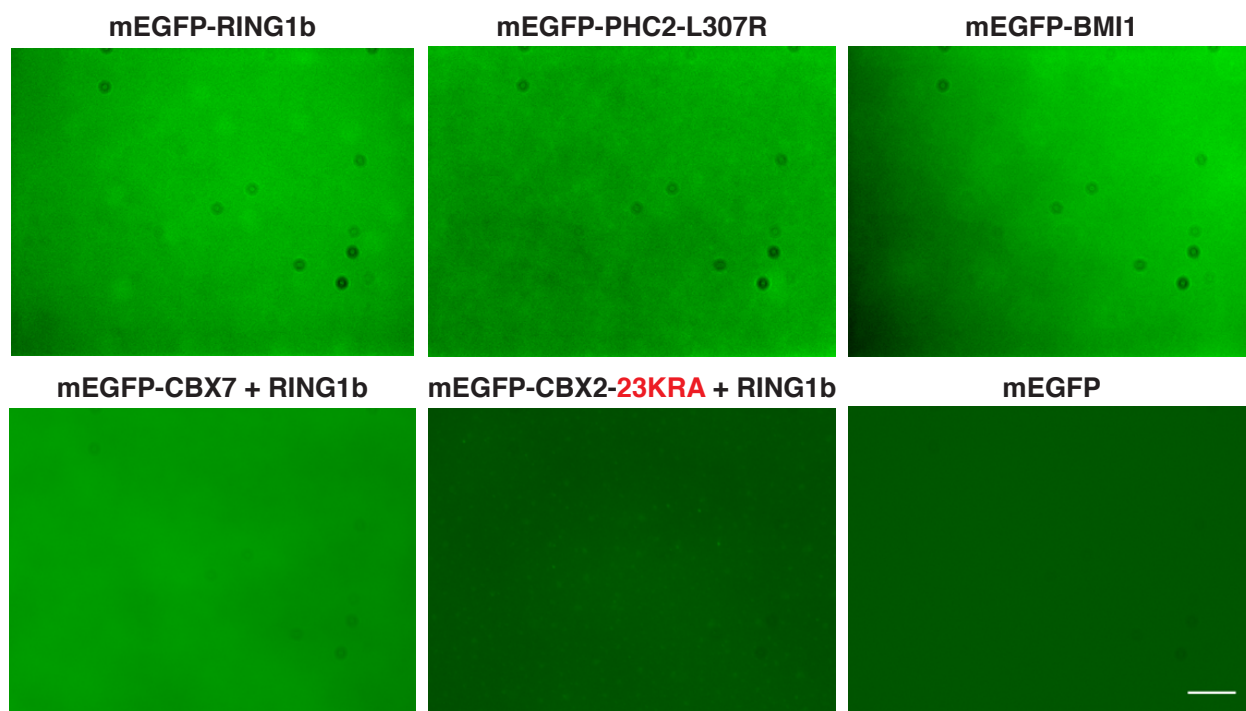

646

647 **Extended Data Figure 2: Higher concentrations of individual PRC1 subunits that do not**  
648 **phase separate *in vitro*.**

649 Micrographs of mEGFP-tagged PRC1 subunits in buffer containing 20 mM HEPES pH 7.9, 100  
650 mM KCl, 1 mM MgSO<sub>4</sub> at the following protein concentrations: RING1b, BMI1, PHC2-L307R,  
651 and mEGFP (12.5 μM), CBX2-23KRA + RING1b (18.4 μM), and CBX7 + RING1b (30 μM).  
652 For each experiment a representative micrograph from two independent protein preparations is  
653 shown. Scale bar = 10 μm.



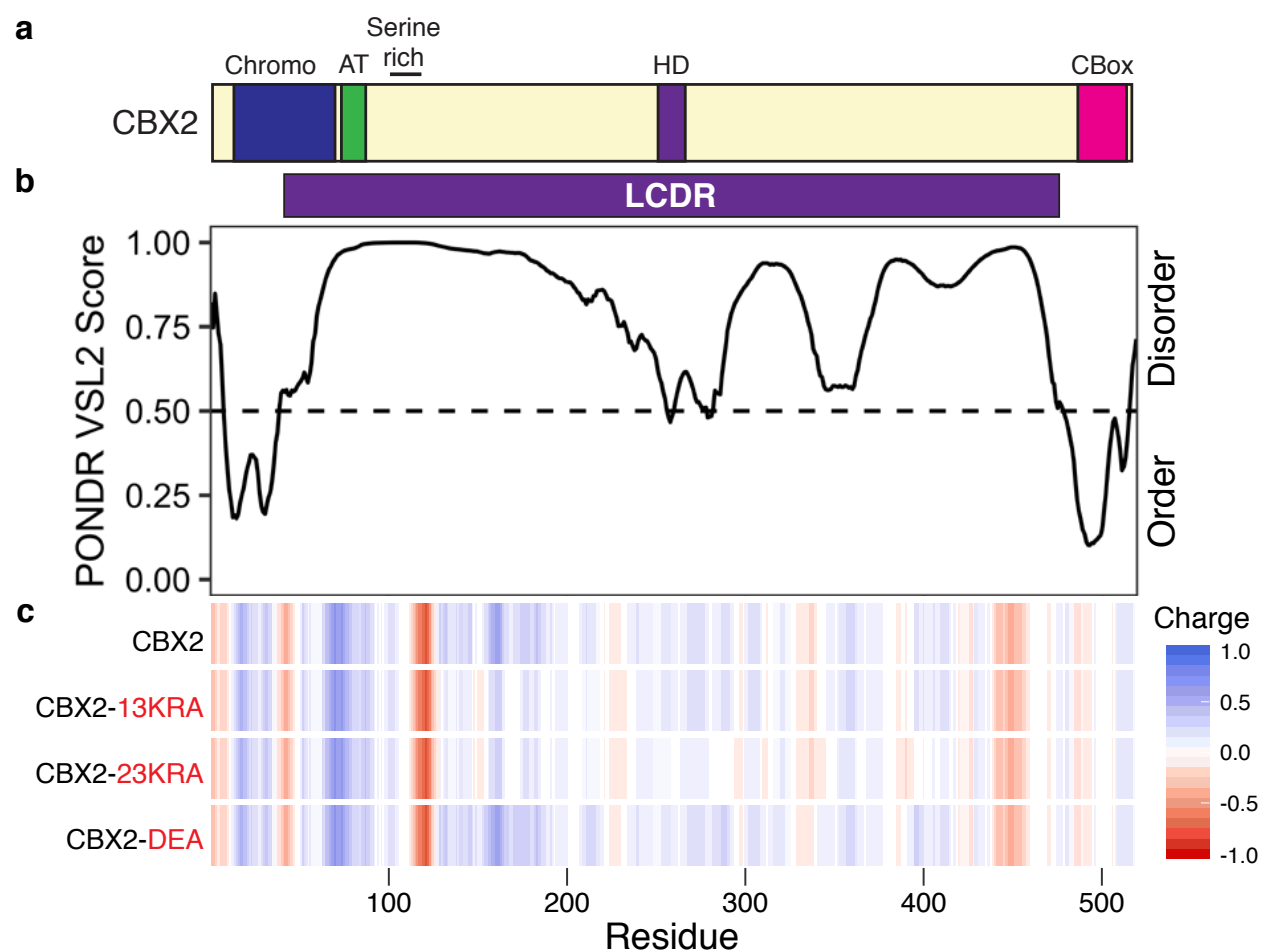

654

655 **Extended Data Figure 3: CBX2 contains a positively charged LCDR.**

656 **a**, Schematic of CBX2 protein domains. **b**, Graph plotting intrinsic disorder with Predictor of  
657 Natural Disordered Regions (POND) using the VSL2 algorithm for CBX2. Purple bar  
658 designates the LCDR in CBX2. **c**, Heat map indicating charge distribution across CBX2 for wild  
659 type and indicated charge mutants.

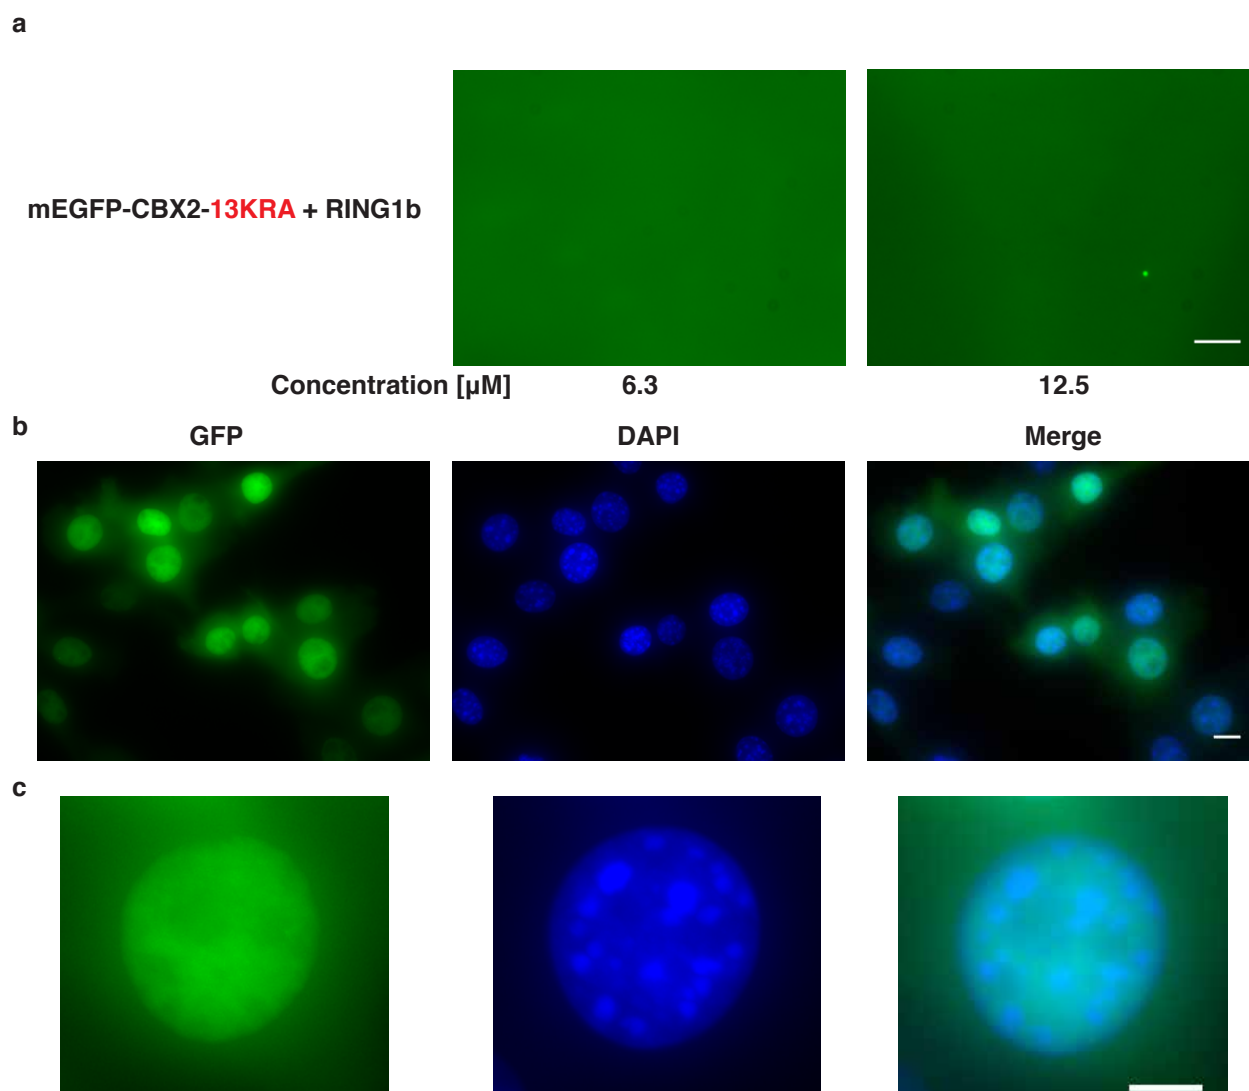

660

661 **Extended Data Figure 4: CBX2-13KRA does not phase separate in vitro and in vivo.**

662 **a**, Micrographs of mEGFP-CBX2-13KRA + RING1b at indicated protein concentration in buffer  
663 containing 20 mM HEPES pH 7.9, 100 mM KCl, 1 mM MgSO<sub>4</sub>. Scale bar = 10  $\mu$ m. **b**,  
664 Representative micrographs of 3T3 fibroblasts expressing mEGFP-CBX2-13KRA after 500  
665 ng/mL doxycycline induction. Column panels from left to right are the GFP channel, DAPI  
666 channel and merged images. Scale bar = 10  $\mu$ m. **c**, Magnified images of representative nuclei  
667 from (b). All cell images are of Z-stacks using formaldehyde fixed cells. Scale bar = 5  $\mu$ m.

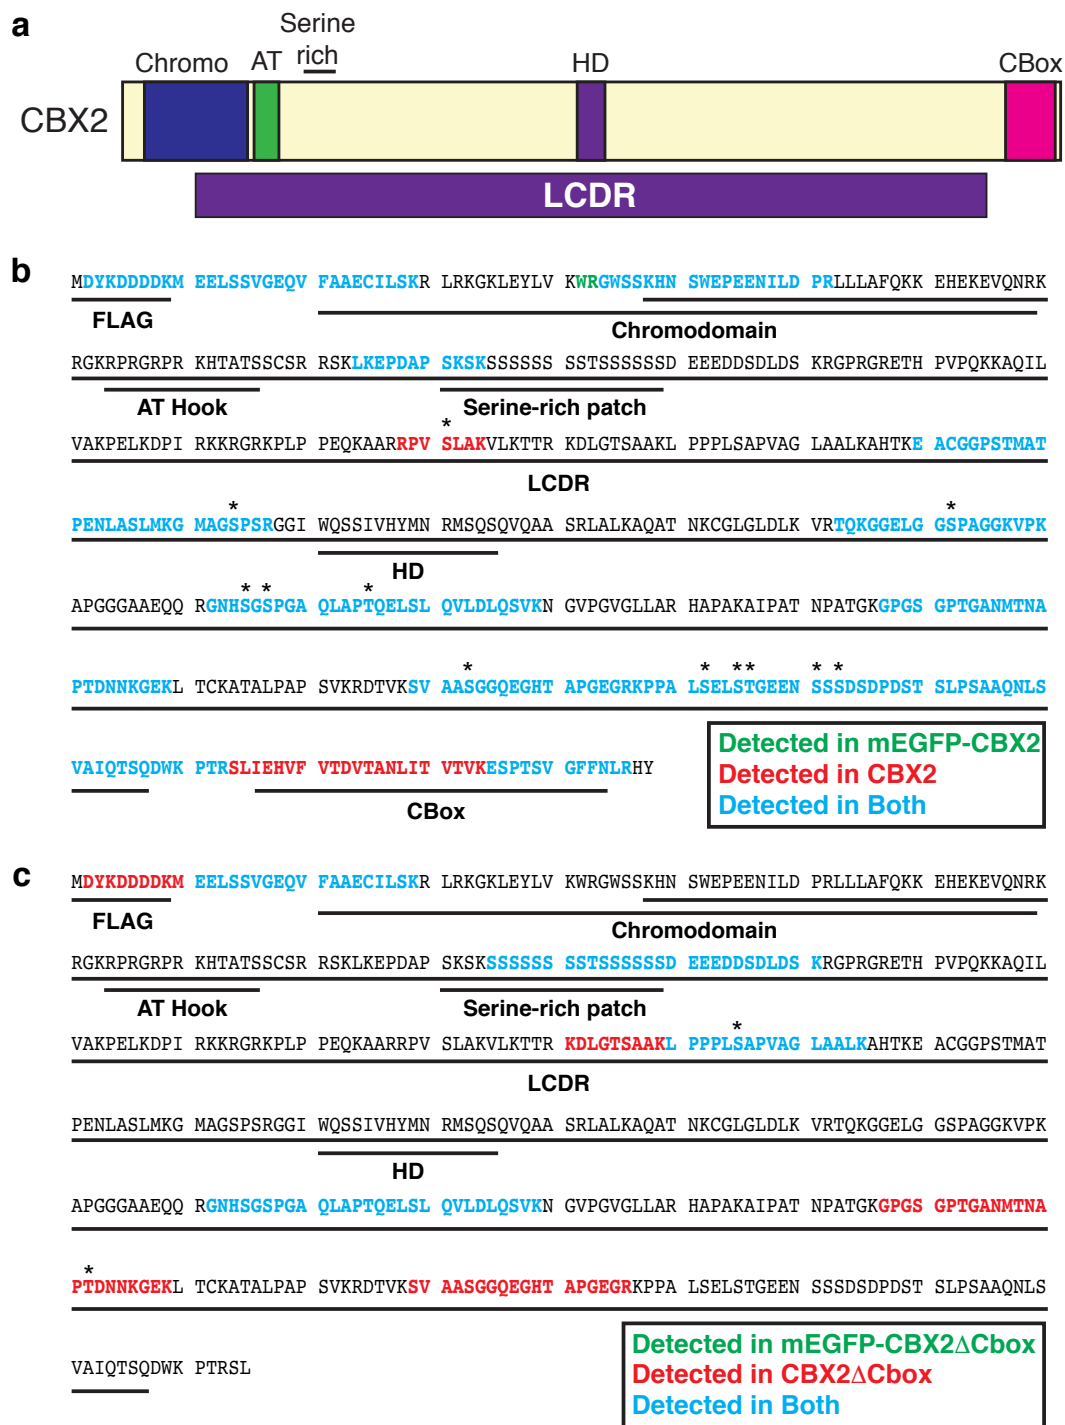

668

669 **Extended Data Figure 5: Phosphorylation sites in purified recombinant CBX2.**

670 **a**, Schematic of CBX2 protein domains with LCDR indicated. **b**, Schematic showing phospho-  
 671 peptides and individual phosphorylated residues in CBX2 and mEGFP-CBX2 purified from Sf9  
 672 cells. Asterisks indicate residues that could be confidently called as phosphorylated within  
 673 peptides containing multiple potential phosphorylation targets. **c**, Schematic showing phospho-  
 674 peptides and individual phosphorylated residues in CBX2ΔCbox and mEGFP-CBX2ΔCbox  
 675 purified from *E.coli* expressing CK2.

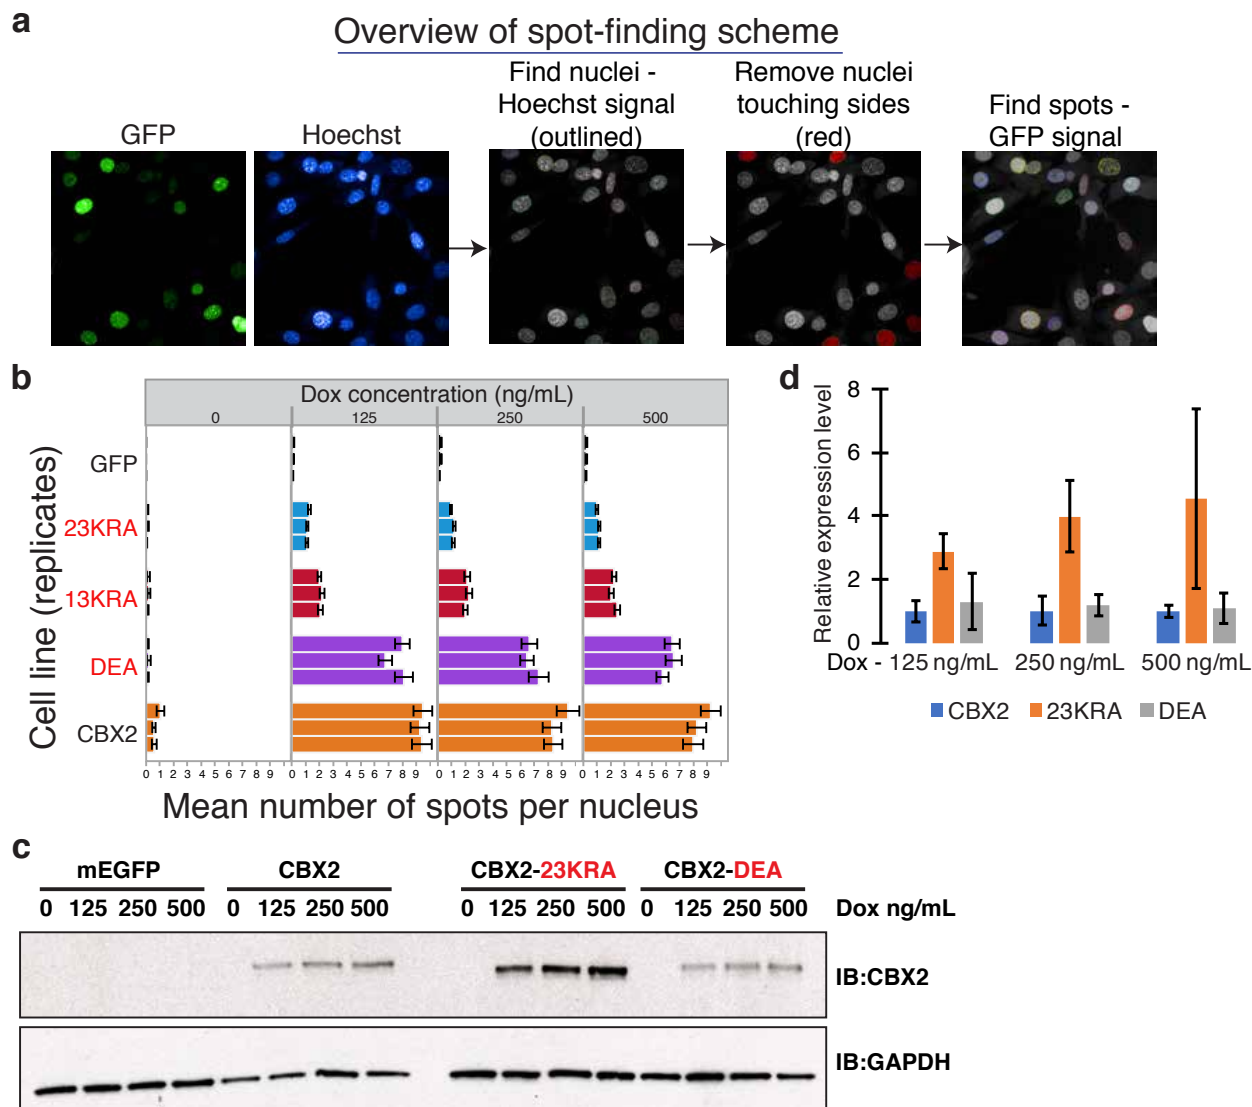

676

677 **Extended Data Figure 6: Punctate structure number and distribution are disrupted by**  
 678 **CBX2-23KRA expression.**

679 **a**, Overview of spot-finding scheme used for (b) and (c). **b**, Quantification of mean number of  
 680 spots per nucleus from three replicates for indicated 3T3 cell line expressing mEGFP-tagged  
 681 CBX2 variants at indicated doxycycline concentration. **c**, Representative immunoblot showing  
 682 expression level of indicated mEGFP-CBX2 variants in 3T3 fibroblasts at indicated doxycycline  
 683 concentrations. GAPDH is shown for loading control. **d**, Quantification of relative protein  
 684 expression level in two replicates of (c). Error bars represent standard deviation.

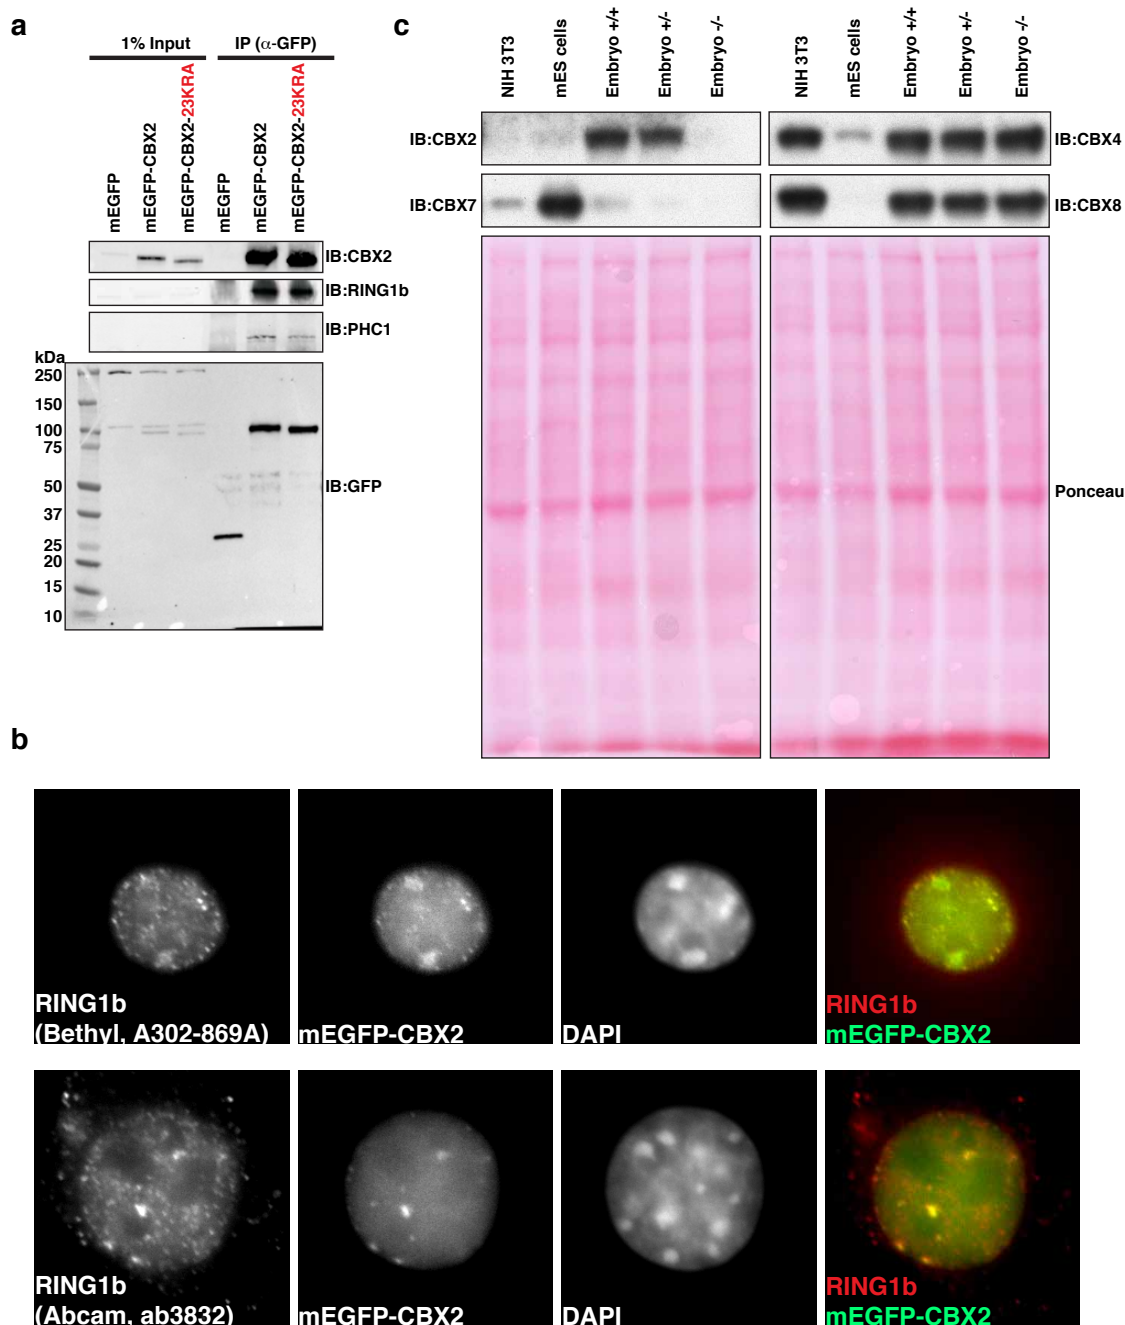

685

686 **Extended Data Figure 7: Induced mEGFP-CBX2 incorporates into PRC1 complexes.**

687 **a**, Co-immunoprecipitation of indicated mEGFP-tagged constructs and endogenous PRC1  
 688 subunits in 3T3 fibroblasts after 500 ng/mL doxycycline induction using anti-GFP antisera. **b**,  
 689 Co-immunofluorescence of RING1b using indicated commercially available antibodies in 3T3  
 690 fibroblasts after 500 ng/mL doxycycline induction of mEGFP-CBX2. Column panels from left to  
 691 right are the Cy3 channel (RING1b), GFP channel, DAPI channel and merged images of Cy3  
 692 and GFP. **c**, Immunoblot of indicated CBX homolog expression in NIH 3T3 fibroblasts, CJ7  
 693 mouse embryonic stem cells, WT mouse embryos, Cbx2 heterozygous and homozygous mutant  
 694 mouse embryos. Ponceau staining of blots are shown for loading.

mEGFP-CBX2

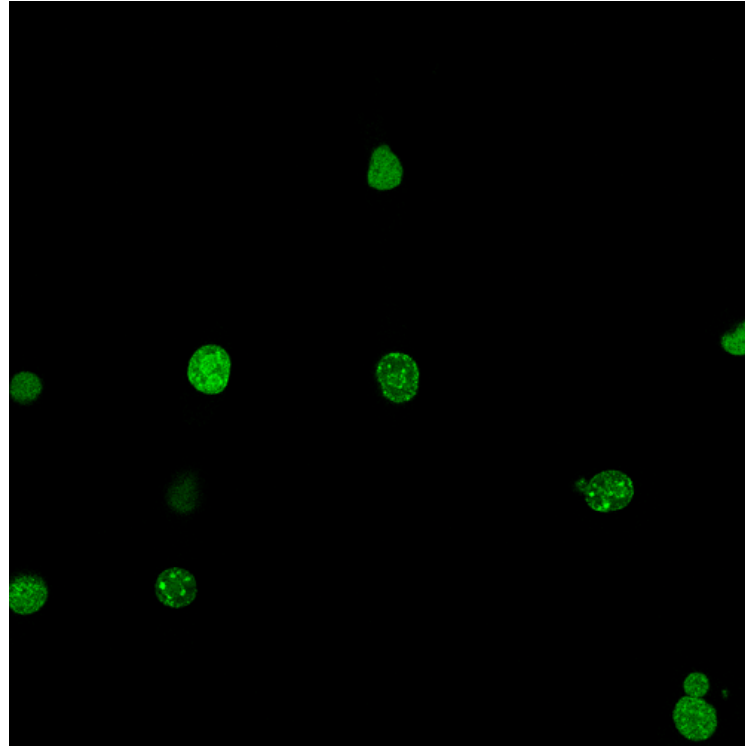

mEGFP-CBX2-23KRA

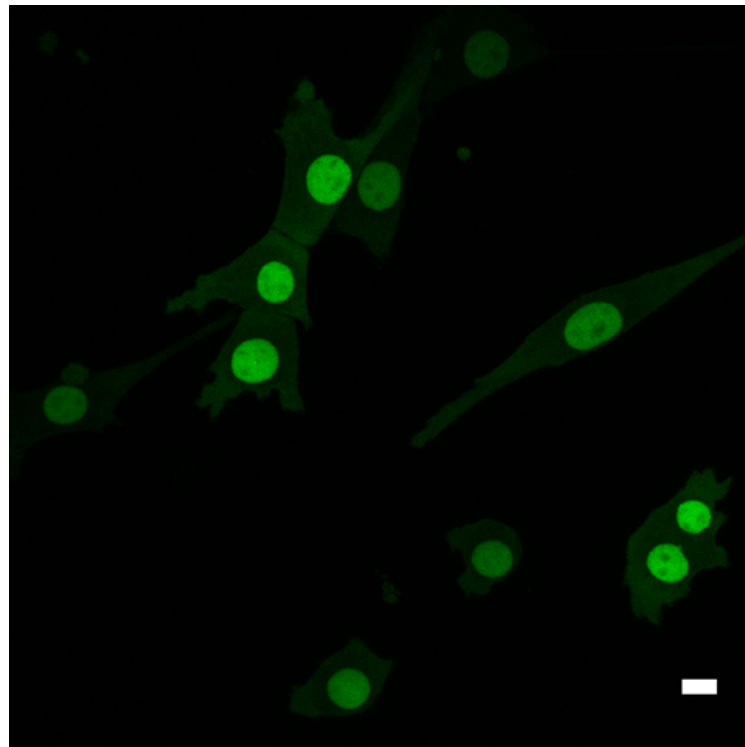

695

696 **Extended Data Figure 8: PRC1 forms punctate structures in live cells.**

697 Representative micrographs of live 3T3 fibroblasts expressing mEGFP-CBX2 or mEGFP-

698 CBX2-23KRA after 500 ng/mL doxycycline induction. Scale bar = 10  $\mu$ m.

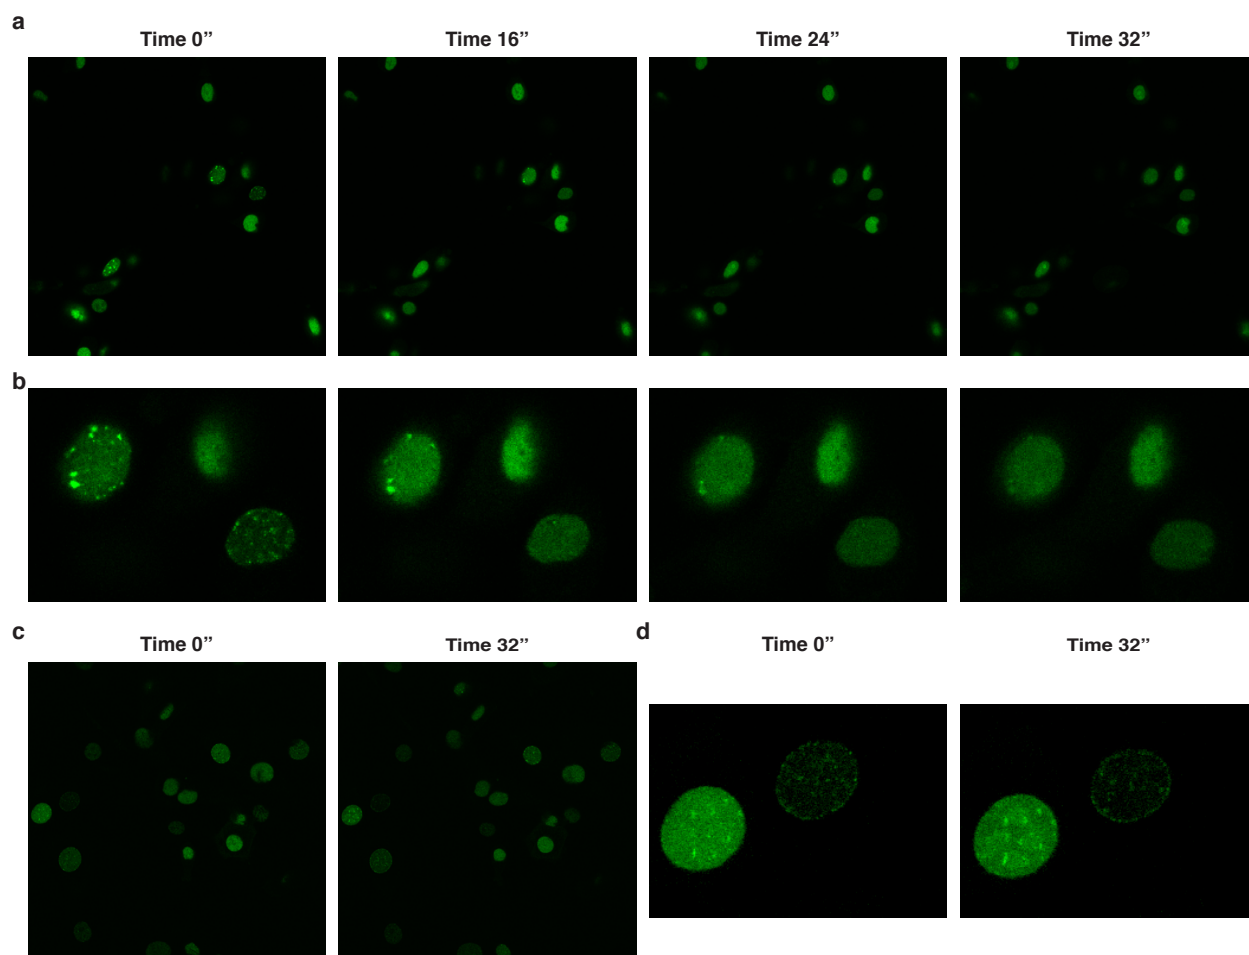

699

700 **Extended Data Figure 9: mEGFP-CBX2 puncta are disrupted by 1,6-hexanediol.**  
701 **a**, Representative images of 1,6-hexanediol experiment at indicated times with mEGFP-CBX2  
702 after 500 ng/mL doxycycline induction in 3T3 fibroblasts. Time 0'' indicates when 1,6-  
703 hexanediol is added. **b**, Magnified images of representative nuclei from (a) showing loss of  
704 puncta upon 1,6-hexanediol addition. **c**, Control experiment with media lacking 1,6-hexanediol  
705 added and imaged at indicated times. **d**, Magnified images of representative nuclei from (c)  
706 showing retention of puncta.



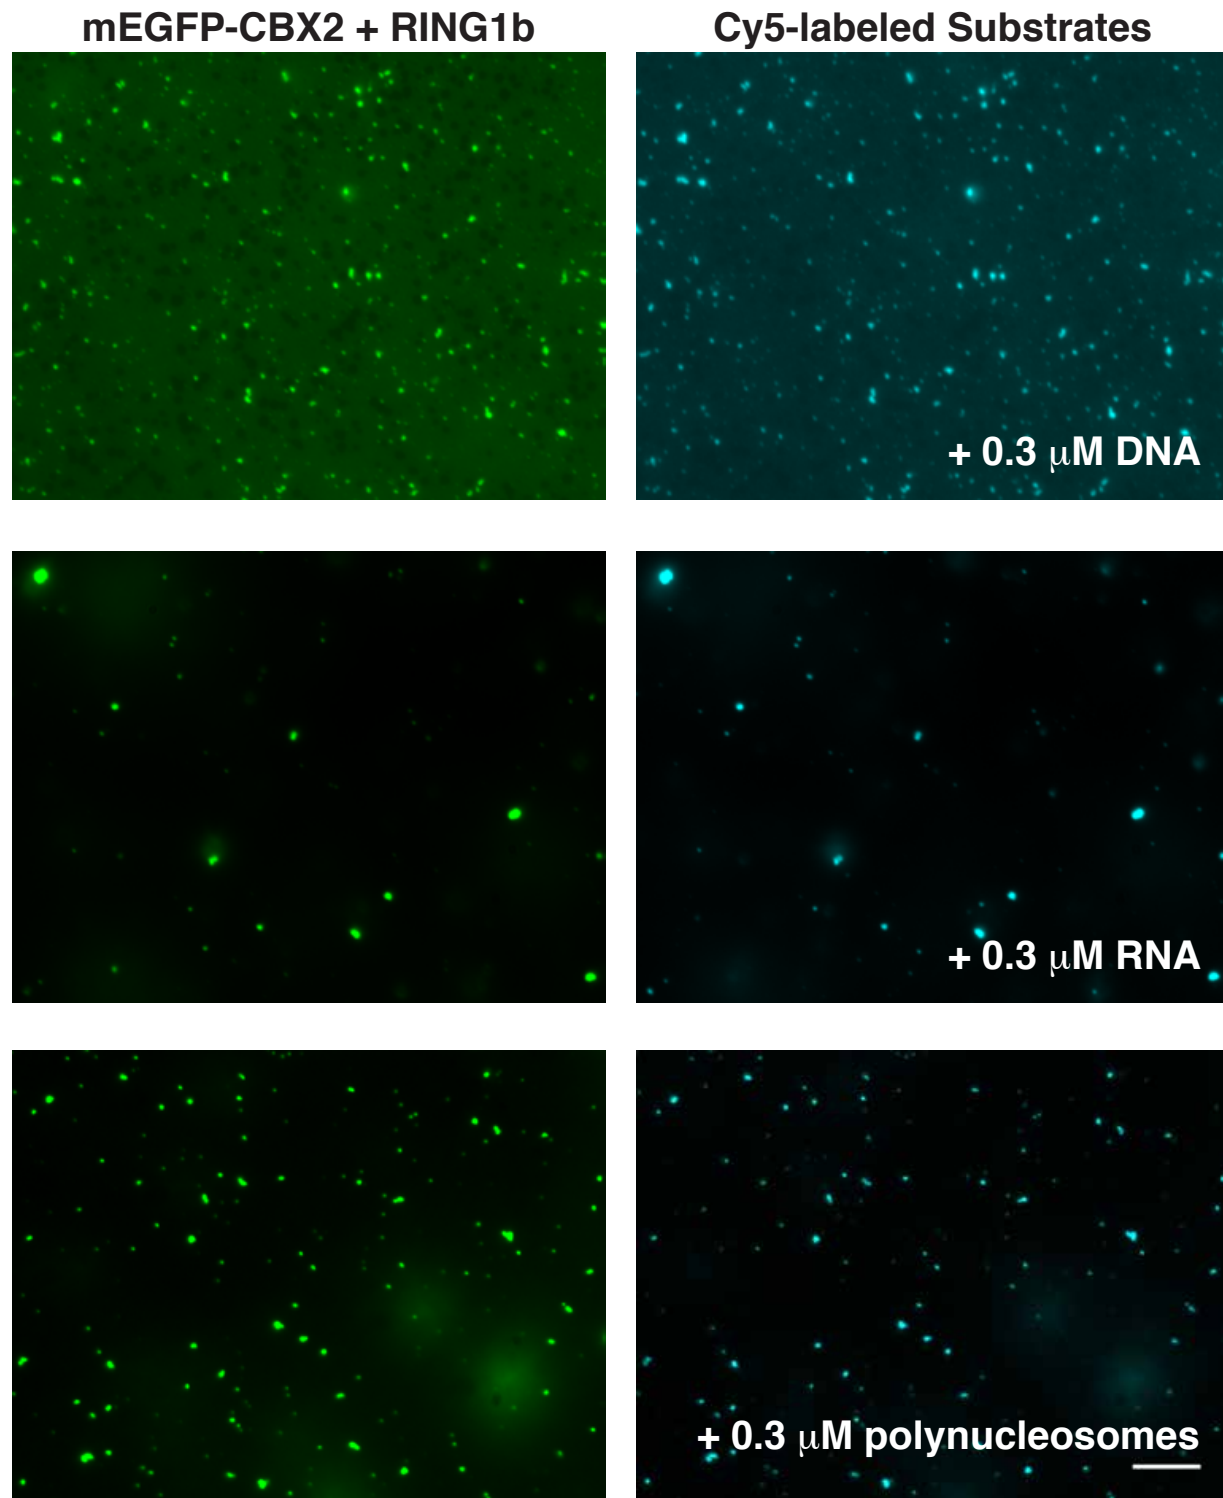

707

708 **Extended Data Figure 10: PRC1 ligands partition into condensates with mEGFP-CBX2 +**  
709 **RING1b when added after droplet formation.**

710 Micrographs of mEGFP-CBX2 + RING1b (6.3  $\mu$ M) with indicated Cy5-labeled substrate (0.3  
711  $\mu$ M). Left panels are GFP channel and right panels are Cy5 channel. Cy5-labeled substrates were  
712 added after formation of mEGFP-CBX2 + RING1b droplets.



713 **Supplementary Table 1. (separate Excel file).** Phosphorylated peptides identified by mass  
714 spectrometry of purified CBX2.

715

716 **Supplementary Table 2. (separate Excel file).** PRC1 peptides recovered after co-IP mass  
717 spectrometry.
